1 *Txikispora philomaios* n. sp. n.g. & Parasitism in Filasterea

2

3 ***Txikispora philomaios* n. sp., n. g., a Micro-Eukaryotic Pathogen of**  
4 **Amphipods, Reveals Parasitism and Hidden Diversity in Class Filasterea**

5

6 Ander Urrutia<sup>a,b</sup>, Konstantina Mitsi<sup>c</sup>, Rachel Foster<sup>d</sup>, Stuart Ross<sup>a</sup>, Martin Carr<sup>e</sup>, Ionan  
7 Marigomez<sup>b</sup>, Michelle M. Leger<sup>c,f</sup>, Iñaki Ruiz-Trillo<sup>c,g,h</sup>, Stephen W. Feist<sup>a</sup>, David Bass<sup>a,d,\*</sup>

8

- 9 a. Centre for Environment, Fisheries, and Aquaculture Science (CEFAS), Barrack Road,  
10 Weymouth, DT4 8UB, UK.
- 11 b. Cell Biology in Environmental Toxicology Research Group, Department of Zoology and  
12 Animal Cell Biology (Faculty of Science and Technology), Research Centre for  
13 Experimental Marine Biology and Biotechnology (PiE), University of the Basque Country  
14 (UPV/EHU), Areatza Pasealekua z/g, Plentzia, 48620, Basque Country, Spain.
- 15 c. Institut de Biologia Evolutiva (CSIC-Universitat Pompeu Fabra), Passeig Marítim de la  
16 Barceloneta 37-49, Barcelona, 08003, Catalonia, Spain.
- 17 d. Department of Life Sciences, The Natural History Museum, Cromwell Road, London, SW7  
18 5BD, UK.
- 19 e. School of Applied Sciences, University of Huddersfield, Queensgate, Huddersfield, HD1  
20 3DH, UK
- 21 f. Department of Biochemistry and Molecular Biology and Centre for Comparative Genomics  
22 and evolutionary Bioinformatics, Sir Charles Tupper Medical Building, Dalhousie  
23 University, 5850 College Street, Halifax, Nova Scotia, B3H 4R2, Canada.
- 24 g. Departament de Genètica, Microbiologia i Estadística, Facultat de Biologia, Institut de  
25 Recerca de la Biodiversitat (IRBio), Universitat de Barcelona (UB), Barcelona, 08028,  
26 Catalonia, Spain
- 27 h. ICREA, Pg. Lluís Companys 23, Barcelona, 08010, Catalonia, Spain.

28

29 **Correspondence**

30 D. Bass, Centre for Environment, Fisheries, and Aquaculture Science (CEFAS), Barrack Road,  
31 Weymouth, DT4 8UB, UK. Tel. no: +441305206752; e-mail: david.bass@cefass.co.uk

32

33

34

35

36

## 1 ABSTRACT

2 This study provides a morphological, ultrastructural, and phylogenetic characterization of a  
3 novel micro-eukaryotic parasite (2.3-2.6  $\mu\text{m}$ ) infecting genera *Echinogammarus* and *Orchestia*.  
4 Longitudinal studies across two years revealed that infection prevalence peaked in late April and  
5 May, reaching 64% in *Echinogammarus* sp. and 15% in *Orchestia* sp., but was seldom detected  
6 during the rest of the year. The parasite infected predominantly haemolymph, connective tissue,  
7 tegument, and gonad, although hepatopancreas and nervous tissue were affected in heavier  
8 infections, eliciting melanization and granuloma formation. Cell division occurred inside walled  
9 parasitic cysts, often within host haemocytes, resulting in haemolymph congestion. Small subunit  
10 (18S) rRNA gene phylogenies including related environmental sequences placed the novel  
11 parasite as a highly divergent lineage within Class Filasterea, which together with  
12 Choanoflagellata represent the closest protistan relatives of Metazoa. We describe the new  
13 parasite as *Txikispora philomaivos* n. sp. n. g., the first confirmed parasitic filasterean lineage,  
14 which otherwise comprises four free-living flagellates and a rarely observed endosymbiont of  
15 snails. Lineage-specific PCR probing of other hosts and surrounding environments only detected  
16 *T. philomaivos* in the platyhelminth *Procerodes* sp. We expand the known diversity of Filasterea  
17 by targeted searches of metagenomic datasets, resulting in 13 previously unknown lineages from  
18 environmental samples.

19

## 20 Keywords

21 *Echinogammarus*; *Orchestia*; Holozoa; Histopathology, Intracellular parasite; Haemolymph  
22 congestion; environmental DNA.

23

## 24 INTRODUCTION

25 The Class Filasterea Cavalier-Smith 2008 currently comprises five species (Shalchian-Tabrizi et  
26 al. 2008; Hehenberger et al. 2017; Tikhonenkov et al. 2020). Initially classified as a nucleariid,  
27 *Capsaspora owczarzaki* was the first filasterean to be described (Stibbs et al. 1979; Owczarzak et  
28 al. 1980; Amaral-Zettler et al. 2001; Hertel et al. 2002; Ruiz-Trillo et al. 2004). This filopodial  
29 amoeba is a facultative endosymbiont (Harcet et al. 2016) isolated from explanted pericardial  
30 sacs of laboratory-grown *Biomphalaria* sp. snails (Stibbs et al. 1979; Morgan et al. 2002), which  
31 remains elusive in environmental samplings (Hertel et al. 2004; del Campo and Ruiz-Trillo 2013;  
32 Shanan et al. 2015; Ferrer-Bonet and Ruiz-Trillo 2017; Arroyo et al. 2018). In contrast, the other  
33 four species (*Ministeria vibrans*, *Ministeria marisola*, *Pigoraptor chileana*, and *Pigoraptor*  
34 *vietnamica*) are free-living flagellates, sampled from marine and freshwater ecosystems  
35 (Patterson et al. 1993; Tong et al. 1997; Hehenberger et al. 2017; Mylnikov et al. 2019). The  
36 discovery of *C. owczarzaki* drew considerable scientific attention, as resistant cysts present in the  
37 mantle of *Biomphalaria glabrata* were observed to attack and kill sporocysts of the trematode  
38 *Schistosoma mansoni* parasitizing the snail (Stibbs et al. 1979; Eveland and Haseeb 2011). *S.*  
39 *mansoni*, which has *B. glabrata* as intermediate host, causes schistosomiasis in humans, a  
40 disease affecting over 230 million people worldwide (Colley et al. 2014).

41 Filasterea are also of interest (Ruiz-Trillo et al. 2008; Suga et al. 2013; Torruella et al.  
42 2015; Hehenberger et al. 2017), as they branch phylogenetically close to the metazoan radiation,

1 being sister to Choanozoa (the Metazoa + Choanoflagellata clade) (Shalchian-Tabrizi et al.  
2 2008; Paps et al. 2013; Torruella et al. 2015; López-Escardó et al. 2019). Morphological (James-  
3 Clark 1868), ultrastructural (Laval 1971; Hibberd 1975), and phylogenetic inference (Cavalier-  
4 Smith 1993; Wainright et al. 1993; Snell et al. 2001; King 2004; Ruiz-Trillo et al. 2006)  
5 suggested a common evolutionary origin for Metazoa and Choanoflagellata, which was  
6 confirmed by phylogenomic analyses (King et al. 2005; Steenkamp et al. 2006; Ruiz-Trillo et al.  
7 2008). Phylogenomic studies also revealed the relationship between genera *Capsaspora* and  
8 *Ministeria* and their sister-clade relationship to Choanozoa (Shalchian-Tabrizi et al. 2008  
9 Torruella et al. 2012; Hehenberger et al. 2017). Since then, the genomes and transcriptomes of  
10 filasterean species have been thoroughly investigated to comprehend the evolutionary processes  
11 that drove the inception of animal multicellularity (Suga et al. 2013; Torruella et al. 2015; Sebé-  
12 Pedrós et al. 2017; Hehenberger et al. 2017; Grau-Bove et al. 2017).

13 For almost 40 years, our knowledge of filasterean ultrastructure came from a single paper  
14 (Owczarzak et al. 1980), describing *C. owczarzaki*. Recently, the ultrastructures of *M. vibrans*  
15 and *Pigoraptor* sp. have been investigated (Torruella et al. 2015; Mylnikov et al. 2019;  
16 Tikhonenkov et al. 2020). Regarding the ecology and global distribution of the species within the  
17 Class, existing information is limited to the sampling locations of type species, and some feeding  
18 observations under culture conditions (Stibbs et al. 1979; Tong 1997; Hehenberger et al. 2017;  
19 Mylnikov et al. 2019; Tikhonenkov et al. 2020). Given the low number of species described the  
20 influence of filastereans in the food web has been thought to be insignificant, at least in  
21 comparison to much bigger protistan clades, or notorious pathogenic taxa. Recent environmental  
22 studies have suggested the relationship between an abundant clade of marine opisthokonts  
23 (MAOP-1) and Filasterea (del Campo et al. 2015; Hehenberger et al. 2017; Heger et al. 2018),  
24 challenging the idea of a small and scarce group. Excluding the facultative endosymbiont *C.*  
25 *owczarzaki*, all filastereans and choanoflagellates are free-living organisms, contrasting with the  
26 parasitic lifestyle of ichthyosporeans (mesomycetozoeans) (Mendoza et al. 2002; Glockling et al.  
27 2013), which includes important pathogens of fish (Ragan et al. 1996; Pekkarinen and Lotman  
28 2003; Andreou et al. 2011), amphibians (Broz and Privora 1952; Pereira et al. 2005; Rowley et  
29 al. 2013), birds, and mammals, including humans (Fredricks et al. 2000; Silva et al. 2005).

30 During a histopathological survey of invertebrates inhabiting the intertidal zone  
31 (Weymouth, UK), an unidentified protist was observed parasitizing two of the most common  
32 species of amphipods (*Echinogammarus* sp. and *Orchestia* sp.). Analysis by light microscopy of  
33 the structure and tissue tropism of the parasite did not allow a clear assignment of the organism  
34 to any of the pathogen groups commonly observed infecting amphipods or crustaceans.  
35 Similarly, examination of the ultrastructure by transmission electron microscopy (TEM), did not  
36 show any distinctive organelle suggesting taxonomic affiliation. Preliminary phylogenetic  
37 analyses of the 18S SSU rRNA strongly indicated that this lineage was a highly divergent novel  
38 genus within Holozoa. However, it did not consistently branch with any of the four established  
39 unicellular clades (Choanoflagellata, Filasterea, Corallochytra/Pluriformea, and Ichthyosporea/  
40 Mesomycetozoea). When a greater diversity of environmental holozoan sequences were included  
41 in the analyses the parasite branched with Filasterea as the earliest diverging branch. This study  
42 comprises a complete histopathological, ultrastructural, and phylogenetic analysis based on the  
43 complete 18S SSU rRNA of the novel parasite, described as *Txikispora philomaios* n. sp. n. g.  
44 We also present data on its prevalence, host range, biological cycle, and potential transmission  
45 routes. Additionally, we demonstrate novel filasterean diversity on the basis of sequences mined

1 from environmental sequencing datasets. The description of *T. philomaios* and its parasitic  
2 lifestyle adds to a growing understanding of filasterean diversity, ecology, and lifestyle traits.

3

## 4 **MATERIALS AND METHODS**

### 5 **Sample collection**

6 Amphipods belonging to genera *Orchestia*, *Echinogammarus*, *Gammarus*, and *Melita* were  
7 collected in the Tamar estuary (Torpoint, Cornwall), Camel estuary (Padstow, Cornwall), Dart  
8 estuary (Dittisham, Devon) and Newton's Cove (Weymouth, Dorset, UK) between 2016 and  
9 2018 (Table 1; Fig. 1). Individuals of *Echinogammarus* sp. and *Orchestia* sp. were sampled in  
10 the upper part of the intertidal zone, behind rocks and algae. Individuals of *Gammarus* sp. and  
11 *Melita* sp. were sampled in the lower part of the intertidal behind small stones and submerged  
12 algae. In addition to amphipods, other very abundant invertebrates sharing the same habitat in the  
13 upper part of the intertidal were also collected in Newton's Cove from May 2019 to September  
14 2019 (Table 2). These organisms include *Capitella* sp. (Polychaeta, Annelida), *Procerodes* sp.  
15 (Turbellaria, Platyhelminthes) and harpacticoid copepods of the Ameiridae family (Crustacea,  
16 Arthropoda), all individually selected using a stereomicroscope.

### 17 **Histology and transmission electron microscopy**

18 Amphipods were kept alive in bottles containing moist algae and dissected within 3-4 hours post  
19 collection. The head and two first thoracic segments were fixed in 100% molecular grade  
20 ethanol. The following proximate segments of the thorax of about 2 mm in size, were fixed in  
21 2.5% glutaraldehyde in 0.1 M sodium cacodylate buffer (pH 7.4) for TEM. The remainder of the  
22 body, which included the last 4-5 segments of the pereon and the pleon, were fixed in  
23 Davidson's seawater fixative (Hopwood 1969) for 24 hours, and then transferred to 70% ethanol.  
24 Fresh smears were produced by cutting the distal part of the antennae or uropods before fixation;  
25 after a preliminary analysis, slides were left to air-dry. Once dry, slides were stained for 1 minute  
26 with Toluidine Blue (1%) and washed with distilled water before being cover-slipped.

27 For histology, Davidson's fixed samples were processed from ethanol to wax in a  
28 vacuum infiltration processor using established laboratory protocols (Stentiford et al. 2013).  
29 Tissue sections (2.5-3  $\mu\text{m}$ ) were cut on a Finnese® microtome, left to dry for 24 hours, mounted  
30 on VWR™ microscope slides, and stained with H&E (Bancroft and Cook 1994). Cover-slipped  
31 sections were examined for general histopathology by light microscopy (Nikon Eclipse E800).  
32 Digital images and measurements were obtained using the Lucia™ Screen Measurement  
33 software system (Nikon, UK).

34 Specimens observed by light microscopy to be infected with *T. philomaios* (one  
35 *Echinogammarus* sp. and one *Orchestia* sp.), were selected for TEM analysis. Glutaraldehyde-  
36 fixed samples were rinsed in 0.1 M sodium cacodylate buffer (pH 7.4) and post-fixed for 1 hour  
37 in 1% osmium tetroxide in 0.1 M sodium cacodylate buffer. Samples were washed in three  
38 changes of 0.1 M sodium cacodylate buffer before dehydration through a graded acetone series.  
39 Then, they were embedded in epoxy resin 812 (Agar Scientific pre-Mix Kit 812, Agar Scientific,  
40 UK) and polymerised overnight at 60 °C. Semi-thin sections (1  $\mu\text{m}$ ) were stained with 1%  
41 Toluidine Blue and analysed by light microscope, to identify target areas containing sufficient  
42 parasites. Ultrathin sections (70-90 nm) were framed on uncoated copper grids and stained with

1 uranyl acetate and Reynold's lead citrate (Reynolds 1963). Grids were examined using a JEOL  
2 JEM 1400 transmission electron microscope and digital images captured using a GATAN  
3 Erlangshen ES500W camera and Gatan Digital Micrograph™ software.

#### 4 **DNA extraction, polymerase chain reaction, cloning and sequencing**

5 The head and anterior part of the thorax (preserved in 100% molecular grade ethanol) of 23  
6 amphipods found to be infected via histology (pereon, pleon, and uropods fixed in Davidson's  
7 seawater fixative) were selected for DNA extraction. Infected tissues were disrupted and  
8 digested overnight (12 hours) using Fast Prep® Lysing Matrix tubes containing 0.2 mg (6 U)  
9 Proteinase K (Sigma-Aldrich®) diluted 1/40 in Lifton's Buffer (100 mM EDTA, 25 mM Tris-  
10 HCl, 1% (v/v) SDS, pH 7.6). Next, a 1/10 (v/v) of 5 M potassium acetate was added to each of  
11 the 23 tubes containing digested sample, Proteinase K, and Lifton's buffer. The solution was  
12 mixed and incubated on ice for 1 hour. From here DNA was extracted using the phenol-  
13 chloroform method described in (Sambrook et al. 1989). The resulting pellet was diluted in 50 µl  
14 of molecular grade water and DNA concentration quantified using NanoDrop™ (Thermo Fisher  
15 Scientific). *T. philomaios*' 18S SSU rRNA (hereafter '18S') was amplified by PCR using  
16 primers targeting different overlapping regions (Table 3), and the following PCR conditions: A  
17 total reaction volume of 20 µl included 10 µl molecular water, 5 µL GoTaq® Flexi Buffer, 2.0  
18 mM MgCl<sub>2</sub>, 0.2 mM of each deoxyribonucleotide, 40 pM of each primer, 0.5 U GoTaq®  
19 Polymerase (Promega), and 200 ng of the extracted DNA. The PCR cycling parameters for  
20 primer pair (SA1nF + 631R; Bass et al. 2012, and in-house design respectively; Table 3)  
21 included denaturation for 5 minutes at 95 °C, followed by 35 cycles alternating: 95 °C (30 s), 57  
22 °C (30 s), and 72 °C (90 s); before a final extension and incubation of the amplicons at 72 °C for  
23 10 minutes. Same conditions were used for primer combinations (S47-152F + S47-617R and  
24 S47-472F + S47-1027R; Table 3) except for the annealing temperature which was 67 °C (30 s).  
25 Amplicons were cleaned using 20% polyethylene glycol 8000 (Sigma-Aldrich®) followed by  
26 ethanol precipitation, and a-tailed to improve cloning efficiency before another PEG 8000 clean.  
27 Clone libraries were created using Strategene's cloning kit (Agilent Technologies, Santa Clara,  
28 CA, USA) as per manufacturer's protocol. Bacterial colonies were picked from LB/ampicillin  
29 plates and suspended in 20 µl PCR water and lysed at 95 °C for 5 minutes. Eight clones from  
30 each library were amplified with 1 µl lysed culture DNA and M13F/M13R primers (Invitrogen™  
31 – Thermo Fisher Scientific) using the mastermix concentrations described previously, and the  
32 manufacturers program. PCR products were bead-cleaned and a total volume of 15 µl was mixed  
33 with 2 µl of the M13F forward primer, before being single-read Sanger sequenced  
34 (Eurofins® Genomics).

#### 35 ***In-situ* hybridization**

36 Tissue sections (4 µm) from the individuals of interest were recovered from the 42 °C water bath  
37 (without Sta-On tissue-adhesive) using Polysine® Slides (Thermo Fisher Scientific) and left to  
38 dry for 24 hours. The forward S47-152F and reverse S47-617R primers were used to amplify  
39 part of the 18S extracted from an infected individual of *Orchestia* sp. DNA amplification and  
40 purification were carried out using the same concentrations and conditions explained in previous  
41 section. Purified DNA was digoxigenin (DIG)-labelled using same primers and PCR conditions  
42 above, but changing the concentration of reagents, say: 10 µl 5X Colorless GoTaq® Reaction  
43 Buffer, 5 µl MgCl<sub>2</sub> solution (Promega), 5 µl of PCR DIG labelling mix (Roche), 3 µl template  
44 DNA, 1 µl of forward and reverse primers, 0.5 µl of GoTaq Polymerase, and 24.5 µl molecular

1 grade water. The control slide was produced amplifying the same 18S region using non-labelled  
2 standard DNTPs. Products generated via PCR were purified as described in previous section,  
3 total DNA quantified (NanoDrop 1000 Spectrophotometer® Thermo Scientific) and diluted to 1  
4 ng/μl for a total volume of 50 μl.

5 Dry tissue sections were dewaxed and rehydrated: Clearene for 5 minutes (2 times),  
6 followed by 100% IDA (industrial denatured alcohol) for 5 minutes and 70% IDA another 5  
7 minutes. Slides were rinsed in 0.1M TRIS buffer (0.1 M TRIS base, 0.15 M NaCl, adjust the pH  
8 to 7.5 adding HCl) and placed in a humid chamber. Each slide was covered with 300 μl of 0.3%  
9 Triton-X diluted in 0.1M TRIS buffer (pH 7.5) for 20 minutes and rinsed with 0.1M TRIS buffer  
10 (pH 7.5). Tissue was covered with Proteinase K diluted to 25 μg/ml in prewarmed (37 °C) 0.1M  
11 TRIS buffer (pH 7.5) and kept for 20 minutes at 37 °C within the humid chamber to prevent  
12 evaporation. Slides were washed in 70% IDA for 3 minutes and 100% IDA for another 3 minutes  
13 before rinsing them in SSC 2X for 1 minute while gently agitating (SSC 1X is 0.15 M sodium  
14 chloride and 0.015 M sodium citrate). Slides were kept in 0.1 M TRIS buffer (pH 7.5) until the  
15 *in-situ* hybridization frame seals (BIO-RAD) were glued to the slide around the sample. Then,  
16 the DIG-labelled probe and the non-labelled probe (control), both 50 μl in volume, were diluted  
17 by adding 50 μl of hybridization buffer and added to the cavity created by the gel frames in the  
18 slide, with the sample in the middle. After DNA denaturation at 94 °C for 6 minutes, slides were  
19 hybridized overnight (16 h) at 44 °C.

20 Samples were washed for 10 minutes with room temperature washing buffer (25 ml of  
21 SSC 20X, 6M Urea, 2 mg/l BSA), before being washed twice with preheated (38 °C) washing  
22 buffer for 10 minutes each. Slides were rinsed with preheated (38 °C) SSC 1X for 5 minutes (2  
23 times) and with 0.1M TRIS buffer (pH 7.5) another 2 times. The blocking step was carried out  
24 with a solution of 6% dried skimmed milk diluted in 0.1M TRIS buffer (pH 7.5) for 1 hour at  
25 room temperature and washed with 0.1M TRIS buffer (pH 7.5) for 5 minutes twice.

26 Slides were incubated with 1.5 U/ml of anti-DIG-AP Fab fragments (Roche) diluted in  
27 0.1M TRIS buffer (pH 7.5) for 1 hour at room temperature in darkness. The excess of Anti-DIG-  
28 AP was removed by 4 successive washes in 0.1M TRIS buffer (pH 7.5) for 10 minutes each.  
29 Slides were transferred to 0.1M TRIS buffer (pH 9.5) which is (0.1M TRIS base, 0.1M NaCl,  
30 adjust pH to 9.5 adding HCl) for 2 minutes and then tissue was covered with NBT/BCIP stock  
31 solution (Roche) diluted in 0.1M TRIS buffer (pH 9.5) at 20 μl/ml, and incubated in darkness  
32 and room temperature until the first clear signs of blue staining appeared (about 30 minutes).  
33 Slides were washed in 0.1M TRIS buffer (pH 9.5) for 1 minute twice and stained with 1%  
34 Bismark Brown for 6 minutes. Finally, slides were dehydrated by immersing them for 30  
35 seconds in 70% IDA, 45 seconds in 100% IDA and 2 washes in clearene for 1 minute each.  
36 Slides were air dried for 30 minutes and permanently cover-slipped with DPX mounting medium  
37 (Sigma-Aldrich).

### 38 **Sequence alignment and phylogenetic analysis**

39 The PCR-amplified 18S rRNA was BlastN-searched (Zhang et al. 2000) against the GenBank  
40 nucleotide (nt) database. Holozoan 18S rDNA gene sequences, as well as sequences from those  
41 uncultured organisms showing highest similarity, were downloaded and aligned with the  
42 consensus 18S rDNA gene sequence from *T. philomaios* in MAFFT v.7 (Katoh et al. 2017) using  
43 the accurate option L-INS-i. The alignment was trimmed by trimAl v.1.4.rev22 (Capella-  
44 Gutiérrez et al. 2009) using the (-gt 0.1) option, and manually curated in SeaView v.4 (Gouy et

1 al. 2010). In turn, the best-fitting model (GTR + F + G) for the alignment was selected using  
2 ModelFinder (Kalyaanamoorthy et al. 2017) as implemented in IQ-TREE v.1.6.10 (Nguyen et al.  
3 2015) and used to generate a ML tree in IQ-TREE. Branch support was obtained from 1000  
4 ultrafast bootstrap values (Minh et al 2013). A second maximum likelihood phylogenetic tree  
5 was constructed using RAxML v8.2.12 (Stamatakis 2014); support values calculated using 1,000  
6 bootstrap replicates were mapped onto the tree with the highest likelihood value (evaluated under  
7 GTRGAMMA model). A Bayesian inference consensus tree was built using MrBayes v.3.2  
8 (Ronquist et al. 2012) under default parameters except for the following: the number of  
9 substitution types was mixed; the model for among-site rate variation, Invgamma; the use of  
10 covarion like model, activated. The MCMC parameters changed were: 5 million generations;  
11 sampling frequency set to every 1,000 generations; burnin fraction value = 0.25; starting tree set  
12 to random, and all compatible groups consensus tree. A final consensus tree figure was created  
13 using FigTree v1.4.3 (Rambaut 2017) and based on the Bayesian topology.

14 A second 18S phylogenetic tree was constructed including environmental and  
15 unclassified sequences branching with or within Filasterea, by mining different databases. The  
16 18S rDNA gene of *T. philomaios* was used as a bait to fish highly-similar sequences, by blastn  
17 searching against the following GenBank archives: nt, whole genome shotgun contigs (WGS),  
18 sequence read archive (SRA), and high throughput genomic sequence archive (HTGS). The same  
19 approach was followed for SILVA ([www.arb-silva.de](http://www.arb-silva.de)), ENA ([www.ebi.ac.uk](http://www.ebi.ac.uk)) and DDBJ  
20 ([www.ddbj.nig.ac.jp](http://www.ddbj.nig.ac.jp)) databases. All environmental sequences branching within Filasterea or  
21 sister to it in a preliminary tree were retained for subsequent analyses (Table 4), as were as a  
22 selection of highly divergent uncultured mesomycetozoean and choanoflagellate sequences.  
23 Sequences belonging to uncultured organisms that branched robustly to existing species in  
24 Ichthyosporea, Choanoflagellata or Metazoa were excluded from the final alignment (the  
25 selected sequences were realigned). The alignment and subsequent phylogenetic analysis were  
26 constructed as described above.

27

## 28 RESULTS

### 29 Clinical signs and prevalence

30 Two amphipod genera, *Echinogammarus* and *Orchestia*, were found infected by *T. philomaios*.  
31 The genera *Gammarus* (n = 279) and *Melita* (n = 101) were also investigated, but no signs of  
32 infection were observed histologically. However, the number of individuals examined was  
33 considerably lower (Table 1). Infection by *T. philomaios* was suggested macroscopically in  
34 heavily infected individuals by a yellowish and opaque tegument (Fig. 2). The carapace  
35 thickened and lost rigidity (Fig. 2B), impeding to discern internal organs, especially the intestine,  
36 which is evident in young healthy individuals. Besides, gross examination of the most  
37 translucent appendages (antennae, uropods, and gills) using a stereomicroscope permitted  
38 detection of the parasite in haemolymph (Fig. 3). Infected individuals displayed lethargy,  
39 unresponsiveness to stimuli, and very reduced jumping ability in the case of the sandhopper  
40 (*Orchestia* sp.).

41 Discrimination between haemolymph cells (8-10  $\mu$ m) and *T. philomaios* cells (2-4  $\mu$ m)  
42 was possible on the basis of the cell diameter and nuclear size (Fig. 3A, 3B). Haemolymph  
43 smears (Fig. 3C) evidenced the difference between the spherical and peripheral nucleus of *T.*

1 *philomaios* (~ 1  $\mu\text{m}$ ) and the central and irregular one in haemocytes (6-8  $\mu\text{m}$ ) (Fig. 3C).  
2 Additionally, fresh preparations allowed to notice the occurrence of up to 10 parasite cells inside  
3 hosts haemocytes. Toluidine staining of the dry smears emphasised the structures, allowing the  
4 observation of cell aggregates (Fig. 3D). The occurrence of *T. philomaios* infection was  
5 consistent throughout the years of study (2016-2018) showing a distinct prevalence peak  
6 between late April and early June; at least for the regularly sampled *Echinogammarus* sp.  
7 population present in Newton's Cove. These outbreaks of *T. philomaios* infection were usually  
8 short-lived, usually lasting no more than three weeks. However, the prevalence of infection was  
9 high, varying between 24% (2018) and 64% (2016) in the coastal location of Weymouth.  
10 Although the limited data from the other sampling sites precluded direct comparison, the parasite  
11 was present in the Dart, Tamar and Camel estuaries at low levels in both spring and autumn (Fig.  
12 4A). *Orchestia* sp. was less frequently and abundantly sampled, but in Newton's Cove, infection  
13 also seemed to peak during May and early June (Fig. 4B). While in *Orchestia* sp. sampled in  
14 Newton's Cove the prevalence was lower (10%), the parasite was more frequently detected in  
15 the Dart and Tamar estuaries. The prevalence of infections in *Echinogammarus* sp. during the  
16 rest of the year (from June to early April) was low (1.9%, n = 1136), and infection was never  
17 systemic. The few parasitic cells observable during these months were almost exclusively  
18 associated with the testis.

## 19 **Histopathology and ultrastructure**

20 Cells of *T. philomaios* were virtually spherical (width =  $1.94 \pm 0.21 \mu\text{m}$ ; length =  $2.36 \pm 0.23$   
21  $\mu\text{m}$ ; n = 50) when fixed in Davidson's seawater fixative, and  $2.26 \pm 0.34 \mu\text{m}$  by  $2.60 \pm 0.41 \mu\text{m}$ ;  
22 n = 50) when preserved in glutaraldehyde. By light microscopy, a nucleus in the periphery of the  
23 cell was distinguished in a very translucent cytoplasm. Parasites were present in the haemolymph  
24 and frequently intracellularly within haemocytes (Fig. 5A). Infected haemocytes (containing up  
25 to 10 *T. philomaios* cells) were often necrotic, with a clear loss of cellular integrity. In contrast,  
26 the parasites inside them appeared to be intact. Aggregates of *T. philomaios* cells occurred free  
27 or within haemocytes, where similar sized stages were contained within a membrane. However,  
28 it was not possible to discern by light microscopy if aggregation was the result of single cells  
29 actively joining, or clusters of cells remaining together after the rupture of the haemocyte  
30 containing them. Proliferation of *T. philomaios* cells was associated with congestion of haemal  
31 sinuses of the tegumental gland and the connective tissue associated with the cuticular  
32 epithelium (Fig. 5B). In such systemic infections (with haemolymph, connective and tegument  
33 affected), *T. philomaios* was frequently observed infecting the hepatopancreas (Fig. 5C), and  
34 seldom in nervous tissue. In the hepatopancreas, the parasite was associated with structural  
35 damage with significant inflammation and granuloma formation, often encapsulating *T.*  
36 *philomaios* cells (Fig. 5C). The testis and ovary (Fig. 5D, 5E) also became infected, notably in  
37 early-stage infections that did not show evidence of the parasite in other organs and tissues.  
38 However, intracellular infections in oocytes and spermatozooids were not observed.

39 At the TEM, *T. philomaios* was found more often as single cells, but also forming  
40 clusters containing 3-4 cells (Fig. 6A, 6B). Single cells, often coated by a cell wall, contained a  
41 pale staining nucleus with a peripheral compact nucleolus, small mitochondria with lamellar  
42 cristae and lipid structures of varying electron-density (Fig. 6A). These lipid inclusions  
43 displayed morphologic plasticity and variable staining characteristics between *T. philomaios*  
44 cells of different size. (Fig. 6C, 6D). Electron-lucent granules appeared integrated within the  
45 cytoplasm, while darker granules were often membrane bound and associated to evaginations of



1 the cell wall (Fig. 6G, 6H). The multi-layered cell wall varied in thickness (Fig. 6G, 6H, 6I) and  
2 in approximately 30% of the cells examined, appeared detached from the plasma membrane (Fig.  
3 6A, 6G). In few cases, a matrix was observable between cell wall and the detached plasma  
4 membrane (Fig. 6C).

5 A multicellular stage of *T. philomaios* was also frequently prominent (Fig. 6B); tricellular  
6 in appearance a hidden fourth cell was occasionally observed (Fig. 7D). In several multicellular  
7 clusters (Fig. 6B, 6E, 6F) the cells were indistinguishable from the unicellular stages present in  
8 the haemolymph (Fig. 6A, 6C, 6D). Occasionally, one or more individual cells contained within  
9 the walled parent cell were necrotic (Fig. 6B). Numerous peripheral mitochondria were observed  
10 in cells with a thickened wall (Fig. 6A, 6I). The thickening of the electron-dense wall of the inner  
11 cells was concurrent with a diminishing wall of the receptacle (Fig. 6D, 6F). The presence of  
12 unicellular and divisional forms of *T. philomaios* inside host haemocytes and tegumental gland  
13 hinted by light microscopy was corroborated by TEM analysis (Fig. 7A, 7B, 7C). Parasite cells  
14 appeared healthy in contrast to the compromised integrity of the infected host cell (Fig. 7C). The  
15 multicellular form appeared more often within haemocytes (Fig. 7A, 7B), while unicellular  
16 stages were more commonly observed free in the haemolymph or inside cells of the host  
17 tegument (Fig. 7C)

18 The majority of *T. philomaios* cells examined corresponded to one of the two main cell  
19 cycle stages described above. The occasional occurrence of intermediate forms and structures  
20 (Fig. 7E, 7F) suggested how unicellular cells were released from multicellular stages. The wall  
21 of the receptacle became reduced until it fractured, allowing dispersal of the walled inner cells.  
22 Just before being released, or immediately after (Fig. 7E, 7F), some of the released cells became  
23 less electron-dense, with a fine matrix between wall and plasma membrane. In later stages, the  
24 cell wall thickened and separated from the plasma membrane, possibly aided by co-occurring  
25 cellular projections (Fig. 7F). At this stage, some of the electron-dense lipid vesicles (Fig. 7G,  
26 7H), seemingly enclosed by a double membrane, were absorbed, or excreted. Occurrence of non-  
27 walled unicellular forms of *T. philomaios* constituted the only stages in which the presence of  
28 microvilli (Fig. 7I) and maybe a flagellum (Fig. 7J) were noticeable. Inside haemocytes non-  
29 walled parasitic cells were loosely enclosed by a membrane of unknown origin (Fig. 7K).  
30 Coinfection of *T. philomaios* with *Haplosporidium* sp. (Urrutia et al. 2020) was not uncommon  
31 (Fig. 7L), but only *T. philomaios* cells were observed inside haemocytes. *In-situ* hybridization  
32 confirmed that the ultrastructure and histopathology of the amphipod infecting microeukaryotes  
33 matched with the 18S identified as *T. philomaios* (Fig. 8). The size and distribution of the DIG-  
34 NTB stained structures coincided with their immediate histological H&E stained sections. Round  
35 blue stains (2-4  $\mu\text{m}$ ) appeared concentrated in tegument, connective tissue, (Fig. 8A, 8B), gills,  
36 haemolymph (Fig. 8C, 8D), and inside haemocytes (Fig. 8E, 8F).

### 37 **Life cycle and potential vectors**

38 The occurrence of a multicellular stage provided strong evidence that *T. philomaios* was  
39 proliferating inside amphipod hosts. Two different amphipod genera were found to be  
40 susceptible to infection by *T. philomaios*, raising questions about host specificity. Therefore,  
41 some common invertebrates cohabiting with *Echinogammarus* sp. and *Orchestia* sp. were  
42 analysed histologically and by PCR. In Newton's Cove, co-occurring polychaetes of genus  
43 *Capitella*, the turbellarian *Procerodes* sp., and harpacticoid copepods were sampled (Table 2).  
44 While evident systemic *T. philomaios* infection in amphipods is limited to late April and May,

1 we recognized the possibility that the parasite might be present in other hosts during a different  
2 time of the year. Thus, abundantly co-occurring invertebrates were sampled during May, June,  
3 July, August, and September. No clear evidence of *T. philomaios* cells were observed in the  
4 histopathological survey of *Procerodes* sp., *Capitella* sp. or harpacticoid copepods. However,  
5 PCR analysis carried out using sets of individuals representing these taxa indicated the presence  
6 of DNA of *T. philomaios* in a single sample comprising *Procerodes* individuals, collected during  
7 May 2019.

## 8 **Phylogenetic analyses**

9 Initially, a partial SSU sequence (ca. 705 bp long, including variable regions V5, V7, V8, and  
10 partial V9) was coincidentally amplified by haplosporidian-specific primers (Hartikainen et al  
11 2014) from an *Echinogammarus* sp. sample later shown to be infected by *T. philomaios*. The top  
12 Blastn match for this sequence was the ichthyosporean *Dermocystidium salmonis* (91.5%  
13 similarity; 92% coverage; e-value = 0). Phylogenetic analysis of this 705 bp sequence (not  
14 shown) placed *T. philomaios* within clade Holozoa, with low nodal support for any particular  
15 position, but often grouping with Ichthyosporea or Filasterea. A longer, equivalent 18S region of  
16 1679 bp generated from an infected *Echinogammarus* sp. individual, resulted in a Blastn match  
17 of 87.90% similarity (99% coverage) to the free living filasterean *Pigoraptor chileana*.  
18 Phylogenetic analysis of the 1679 bp region (Fig. 9) was consistent with that using the shorter  
19 fragment, and robustly placed *T. philomaios* as an holozoan, but very weakly branching as the  
20 earliest diverging lineage in Holozoa.

21 Several databases were mined for environmental sequences (process specified in section  
22 2.5) related to *T. philomaios* (Table 4). The resulting phylogenetic tree (Fig. 10) showed some  
23 interesting differences when compared to the tree without environmental sequences (Fig. 9). In  
24 particular, in Fig. 10 *T. philomaios* branched within Filasterea, in a clade mostly comprising  
25 environmental sequences, but also Ministeria. The filasterean clade was more strongly supported  
26 with the inclusion of the environmental sequences, with supports of (0.98, 21, 72; posterior  
27 probability, ML bootstrap, and ML ultrafast bootstrap, respectively) compared to (0.9, -, -) in  
28 Fig. 10. The metazoan, choanoflagellate, and fungal clades were again fully/strongly supported,  
29 although the ML bootstrap support for the ichthyosporean clade was lower: 1, 34, 68 in Fig. 10  
30 to 0.99, 73, 82 in Fig. 9. The phylogenetic position of the two pluriformean species as basal to  
31 choanoflagellates was maintained, but the support for *C. limacisporum* in that position increased  
32 from (0.32, -, 46) to (0.91, 19, 64).

33 The filasterean clade in Fig. 10 was moderately well supported by Bayesian Inference  
34 (0.98, 21, 72) but contained a large proportion of partial environmental sequences yielding  
35 disparity between ML methods. *Txikispora* was a robustly placed sister to Metagenome seq.  
36 OBEP010137028) sampled from sandy/muddy sediments associated with algae in Ulvedybet in  
37 Limfjorden (northern Denmark) (Karst et al. 2018). These, together with *Ministeria*, formed a  
38 clade with other environmental sequences from fresh groundwater systems in Denmark  
39 (OBEP010275669, OBEP010278239, OBEP010275324, OBEP010275456, OBEP010276073)  
40 and New York State (ORJL011316691) (Karst et al. 2018; Wilhelm et al. 2018), with the  
41 exception of OBEP010162136, which also came from the coastal location of Ulvedybet in  
42 Limfjorden (Karst et al. 2018). The other characterised filasterean taxa, *Capsaspora* and  
43 *Pigoraptor*, grouped separately within the filasterean clade, and potentially more closely to each  
44 other than to *Ministeria* and *Txikispora* (Fig. 10)

1 Several environmental sequences branched close to *Capsaspora* and *Pigoraptor*.  
2 Metagenomic sequence OBEP01433235, collected from the sediments in a freshwater lake  
3 (Denmark) was very closely related to *Pigoraptor*. Additionally, two almost identical sequences  
4 (FPLL01002905 and FPLS01019718) collected from soil samples in Denmark (Karst et al. 2016)  
5 were robustly sister to *C. owczarzaki* (100, 100, 100). Two further clades of environmental  
6 sequences branched within the filasterean clade as shown on Fig. 10. One was an abundant group  
7 of uncultured marine organisms named “MAOP1-Marine Opisthokonts”, which was weakly  
8 sister to *Pigoraptor* in Hehenberger et al. (2017). The other was a clade formed by short  
9 sequences (indicated on Fig. 10 as LN\*\*\*\*\*) collected from a subterranean colony of ants  
10 adjacent to Chagres river, Panama (Scott et al. 2010).

11

## 12 DISCUSSION

### 13 Phylogeny and diversity

14 Until the recent addition of *Pigoraptor* by Hehenberger et al. (2017), Class Filasterea comprised  
15 only two genera: *Capsaspora* (*C. owczarzaki*) and *Ministeria* (*M. vibrans* + *M. marisola*).  
16 Hehenberger et al. (2017), also suggested the inclusion of an abundant group of marine  
17 opisthokonts “MAOP-1” (del Campo and Trillo 2013) into Filasterea. The ecology of these clade  
18 formed by uncultured organisms remains entirely undetermined except for an apparent  
19 inclination for the low oxygen fraction of the water column in coastal waters of the Indian,  
20 Atlantic and Pacific Oceans. Our results (Fig. 10) further support the inclusion of MAOP-1 in  
21 Filasterea. However, none of the ML analyses are conclusive, and the relative phylogenetic  
22 position of the group among existing filasterean species varies. In Hehenberger et al. (2017),  
23 MAOP-1 appeared as sister to *Pigoraptor* sp. (ML Bootstrap = 52%), but our analysis showed it  
24 as weakly sister to *Pigoraptor* spp, plus *C. owczarzaki* (in both cases with related environmental  
25 sequences) plus the LN\*\*\*\*\* environmental sequences. Our 18S phylogenetic analysis without  
26 environmental sequences (Fig. 9) also supported the inclusion of *T. philomaaios* into Holozoa, but  
27 not its association with Filasterea. Ongoing phylogenomic analyses seek to place *T. philomaaios*  
28 using a much larger number of genes.

29 It is well established that single-gene trees are unable to resolve deep eukaryotic  
30 phylogenetic relationships. This is particularly evident for holozoan relationships, as shown by  
31 Simion et al. (2017) among others. Our results suggest that the use of uncharacterized  
32 environmental sequences in phylogenetic studies based on 18S provide additional phylogenetic  
33 information that may assist in resolving evolutionary relationships of novel holozoan organisms,  
34 as has previously been demonstrated for other eukaryotic groups and eukaryotes as a whole (e.g.  
35 Berney et al 2004; Cavalier-Smith 2004; Bass et al. 2018; Hartikainen et al. 2016).

36 Several environmental sequences were closely related to existing filasterean species (Fig.  
37 10). The uncultured sequence Metagenome seq. OBEP011433235 most likely belongs to a novel  
38 *Pigoraptor* sp. species, which evidences the preference of the genus for the sediments of stagnant  
39 freshwater systems, and a global distribution (Denmark, Chile, Vietnam). However, the  
40 environmental sequences FPLL01002905 and FPLS01019718, although sister to *C. owczarzaki*,  
41 are too distantly related to sensibly infer any lifestyle or other phenotypic similarity between  
42 them and *Capsaspora*. Interestingly, its occurrence in a Danish grassland (Karst et al. 2016),  
43 contrasts with the rest of environmental sequences associated to Filasterea, which were sampled

1 from aquatic ecosystems. Although it is not possible to determine whether other filasterean  
2 environmental sequences are parasites, other symbionts, or free-living, our discovery of a true  
3 filasterean parasite means that this is now a realistic working hypothesis.

4 At some point in the evolutionary history of their lineages, *C. owczarzaki* and *T.*  
5 *philomaios* evolved endosymbiotic and parasitic behaviours closely associated with host  
6 haemolymph and haemocytes, highly uncommon target cells/tissues in the related clade  
7 Ichthyosporea (Glockling et al. 2013). Whether filasterean radiation preceded that of early  
8 metazoans 650-833 million years ago (Paps 2018) remains unresolved. Nonetheless, a common  
9 tissue trophism could suggest certain predisposition in the early ancestors of filastereans to  
10 colonize the haemolymph (or precursor cells) of other organisms, that could be shared by related  
11 uncultured filastereans. Actually, tissue specificity is often determined by evolutionary changes  
12 occurring early in a lineage, for instance, in ichthyosporeans a different tissue trophism allows to  
13 differentiate between the two orders (Mendoza et al. 2002), but it also happens in other protist  
14 clades in and out Holozoa; as it is the case of myxozoans (Molnár and Székely 2014) or  
15 apicomplexans (Leander et al. 2006).

## 16 **Clinical signs and histopathology**

17 *T. philomaios* cells congest the host's haemolymph and tegument, making heavily infected  
18 amphipods present a light-yellow colouration and reduced carapace transparency (internal organs  
19 are not easily visible through the carapace). Definite colour alterations of the host's carapace have  
20 been documented for other parasitic infections, such as those produced by acanthocephalans,  
21 cestodes, and trematodes (Lagrue et al. 2016; Johnson and Heard 2017). Other microeukaryotic  
22 cells targeting tegument and haemolymph in amphipods (*Haplosporidium* sp.) have also been  
23 associated with a pallid carapace and opacity. However, amphipods with heavy haplosporidiosis  
24 look whitish rather than yellowish, at least in *Echinogammarus* sp. and *Orchestia* sp. (Urrutia et  
25 al. 2019). The formation of cell aggregates, very evident in fresh haemolymph smears, are  
26 characteristic among filastereans (Sebé-Pedrós et al. 2013) and facilitates the differentiation  
27 between *T. philomaios* and other protistan parasites with similar size. We have also observed  
28 infected hosts to be more sessile and unresponsive to stimuli, but this is the case for other protist  
29 parasite infections as well, not only in amphipods (Feist et al. 2009; Lefèvre et al. 2009).

30 Measuring less than 3 µm in diameter *T. philomaios* is one of the smallest known  
31 holozoans. In clade Filasterea only the bacterivorous *M. vibrans* would have a similar size, with  
32 its round cells being 2.1-3.6 µm in diameter (Myl'nikov et al. 2019). The highly motile predators  
33 *P. vietnamica* and *P. chileana* tend to be considerably bigger (5-12 µm), in the size range of  
34 most choanoflagellates and corallochytreans (Raghu-kumar 1987; Dayel and King 2014;  
35 Tikhonenkov et al. 2020). Only the zoospores of few species of ichthyosporean parasites such as  
36 *Sphaerothecum destruens* or *Dermocystidium percae* have been reported to have a similar or  
37 even smaller size than *T. philomaios* (Pekkarinen and Lotman 2003, Andreou et al. 2011). A  
38 reduced body and genome size have been linked to parasitism in other protistan groups such as  
39 microsporidians or myxozoans (Keeling and Fast 2002; Keeling 2004; Holzer et al. 2018). This  
40 has not been studied for unicellular holozoans, possibly due to the absence of parasites among  
41 choanoflagellates, and rarity of free-living forms in Ichthyosporea (Mendoza et al. 2002;  
42 Glockling et al. 2013; Hassett et al. 2015). Filasterea now includes free-living, symbiotic, and  
43 parasitic species, making it a good candidate for such comparative analyses, especially when  
44 ecological and genomic data from the group's uncharacterised diversity are elucidated. The

1 presence of holozoan protists with reduced genomes could provide very valuable information, as  
2 many studies focus on gene gains and losses to understand how and when animal multicellularity  
3 evolved (Paps et al. 2013; Grau-Bove et al. 2017; Richter et al. 2018).

#### 4 **Ultrastructure**

5 Ultrastructurally, a crown of microvilli around a single flagellum makes choanoflagellates the  
6 most easily identifiable of all unicellular holozoans (Mah et al. 2014). The presence of a single  
7 posterior flagellum is a hallmark trait among opisthokonts (Cavalier-Smith 1987) and also been  
8 observed in holozoan Classes Filasterea, Corallochytraea and Ichthyosporea (Marshall et al. 2008;  
9 Torruella et al. 2015; Hehenberger et al. 2017; Mylnikov et al. 2019).

10 Fresh smears of *T. philomaios* showed the presence of cell-projections comparable to the  
11 flagellar structures described by light microscopy and TEM in *M. vibrans* and *Pigoraptor* sp.  
12 (Torruella et al. 2015; Hehenberger et al. 2017; Mylnikov et al. 2019). However, no evidence of  
13 a flagellum was observed in the histopathological analysis, and we only have limited  
14 ultrastructural evidence of its occurrence by TEM (Fig. 7J). While inconclusive, we must note  
15 that in fresh smears *T. philomaios* cells were exposed to a substrate and marine water, but  
16 histology and TEM analysed them fixed in tissues and haemolymph. The zoospores of  
17 dermocystids are the only known flagellated stage among parasitic/endosymbiotic holozoan  
18 protists, and quickly lose the flagellum after penetrating into the host (Pekkarinen et al. 2003).  
19 Besides, the flagellum of *M. vibrans* was only observed after examination of over 1,000 cells  
20 (Mylnikov et al. 2019), a number not reached for *T. philomaios*, which has also resisted culturing  
21 attempts (see below). A non-flagellated *T. philomaios* would imply a secondary loss of the  
22 structure (based in our phylogeny, Fig. 10), the second one within Filasterea after *C. owczarzaki*.  
23 Two losses are less parsimonious, but could strengthen the idea of a parasitic/endosymbiotic  
24 lifestyle driving them, which has also been suggested for non-flagellated ichthyosporean  
25 parasites in order Ichthyophonida (Marshall and Berbee 2011, Torruella et al. 2015).

26 Microvilli are actin-based filopodial structures present in filozoans (Karpov et al. 2016;  
27 Sebé-Pedrós et al. 2017; Mylnikov et al. 2019). They form a crown around the flagellum in  
28 choanoflagellates they are evenly distributed around the cell in all filastereans and pluriformeans  
29 (Mylnikov et al. 2019; Tikhonenkov et al. 2020), clades in which they can be up to three or four  
30 times the length of the cell (10  $\mu\text{m}$  in *M. vibrans*, 20  $\mu\text{m}$  in *C. owczarzaki*, and 34  $\mu\text{m}$  in *S.*  
31 *multiformis*). However, they are not present in cystic and dividing stages, what could explain the  
32 reduced evidence for them in *T. philomaios* (Fig. 7I). Moreover, their occurrence was not noticed  
33 in the original descriptions of *C. owczarzaki* done on explanted pericardial sacs of snails  
34 (Owczarzak et al. 1980), but they are evident when the facultative symbiont is in axenic culture  
35 (Sebé-Pedrós et al. 2013), where they have been shown to facilitate movement, cell-cell  
36 adhesion, and food particle capture (Parra-Acero et al. 2020). It is possible that microvilli are not  
37 desirable in the haemolymph of a host, where the current impedes movement and there is no  
38 substrate surface other than target haemolymph cells.

39 Opisthokonts are characterized by flat non-discoïd cristae (Cavalier-Smith and Chao  
40 1995), with ichthyosporean *Ichthyophonus hoferi* being one of the few exceptions (Spanggaard  
41 and Huss 1996). Mitochondria in *T. philomaios* follows the norm and possesses lamellar cristae  
42 (Fig. 7G, 7I). The radial distribution of numerous mitochondria in the periphery of non-cystic  
43 stages (Fig. 6A) could indicate a close in time cell division between daughter cells, as observed  
44 in the ichthyosporean *Sphaerothecum* sp. (Borteiro et al. 2018). In contrast, the absence of

1 mitochondria in stages with a thicker wall suggests a resistant spore-like stage, as it is the case in  
2 the ichthyosporean *Amphibiocystidium* sp. (González-Hernández et al. 2010). However, the  
3 structure and activity of mitochondria in parasites has been observed to be extremely flexible  
4 (Zíková et al. 2016), as they would be able to use mitochondrial metabolites of the host (de Melo  
5 and Souza 1992).

6 Numerous electron-dense bodies comparable to those observed in other filasterean  
7 species (Owczarzak et al. 1980, Tikhonenkov et al. 2020) are scattered in the cytoplasm of *T.*  
8 *philomaios* (Fig. 6A, 6C, 6D, 7G, 7H, 7K). However, their occurrence is not characteristic of  
9 filastereans or even holozoan protists, as they have been observed in distantly related clades such  
10 as apicomplexans, ascetosporeans or dinoflagellates (Speer et al. 1999; Stentiford and Shields  
11 2005; Feist et al. 2009). Nevertheless, their size and number has been suggested to be of  
12 taxonomic value in Mesomycetozoa (Pereira et al. 2005), and indicative of the function of  
13 certain life stages and their maturation (Vilela and Mendoza 2012; Fagotti et al. 2020). These  
14 bodies have been described as lipid globules in *M. vibrans* (Mylnikov et al. 2019) and reserve  
15 substances (most likely glycoprotein) in genera *Pigoraptor* and *Syssomonas* (Tikhonenkov et al.  
16 2020). In contrast, the occurrence of a double lipidic layer around them in *C. owczarzaki* made  
17 Owczarzak et al. (1980) suggest that these “lipid filled vacuoles” were excreted. In *T. philomaios*  
18 we observe two main forms; the first is a smaller and electron-lucent body similar to those  
19 observed in genera *Ministeria*, *Pigoraptor*, and *Syssomonas*. The second form is a larger and  
20 electron-dense body surrounded by a double lipid layer (Fig. 6H, 7G) that appears to be excreted  
21 (Fig. 7H) as proposed for *C. owczarzaki*. However, its implication in the formation of the cell  
22 wall should be considered, as it is not clear how the ejected material could trespass the outer  
23 membrane (Fig. 7G).

## 24 **Life cycle and potential hosts**

25 So far, all filastereans have been culturable (Stibbs et al. 1979; Cavalier-Smith and Chao 2003;  
26 Hehenberger et al. 2017; Mylnikov et al. 2019), allowing a detailed description of their life cycle  
27 in culture conditions. In contrast, *T. philomaios*, like most parasites in the clade Ichthyosporea  
28 remains unculturable (Cafaro 2005; Glockling et al. 2013). According to the diagnostic  
29 description of Class Filasterea Cavalier-Smith 2008, trophic stages in this lineage do not possess  
30 a cell wall (Shalchian-Tabrizi et al. 2008). In free-living genera *Pigoraptor* and *Ministeria*, this  
31 non-walled stage corresponds to a flagellated amoeba which uses its retractile microvilli to  
32 capture preys and attract food particles (Hehenberger et al. 2017; Mylnikov et al. 2019). In turn,  
33 trophocytes of the endosymbiont *C. owczarzaki* lack a flagellum, and even microvilli if cultured  
34 in explanted tissues of *B. glabrata* (Owczarzak et al. 1980; Sebé-Pedrós et al. 2013). Although  
35 morphologically different, the behaviour of trophocytes is the same in all known filasterean  
36 species; they can either divide by binary fission or encyst when the food source is depleted  
37 (Hertel et al. 2002; Tikhonenkov et al. 2020). The binary fission observed by light microscopy in  
38 few walled cells of *P. vietnamica* (Tikhonenkov et al. 2020) represents the only known exception  
39 of cellular division occurring outside the trophic stage. Interestingly, our TEM analysis indicates  
40 that quite the contrary occurs for *T. philomaios*, in which cell division appears to occur  
41 exclusively inside walled cells (Fig. 6B, 6I, 7D) as in Corallochytrium and Ichthyosporea  
42 (Raghu-Kumar 1987; Lotman et al. 2000; Pekkarinen et al. 2003; Glockling et al. 2013). If  
43 flagella and/or microvilli occur in *T. philomaios* trophocytes (Fig. 7I, 7J), these structures are lost  
44 when parasitic cells either penetrate or are engulfed by host haemocytes (Fig. 7K).

1           A single host haemocyte can contain up to ten *T. philomaios* cells, in which four walled  
2 endospores arise inside walled parent cells (Fig. 7D). Comparable cellular structures containing  
3 16-32 endospores are the result of a palintomic division in corallochytrean cystic stages (Raghu-  
4 Kumar et al. 1987; Tikhonenkov et al. 2020). Once mature, *T. philomaios* endospores would  
5 leave the parent cells through an opening formed in its wall, by which time its thickness is much  
6 reduced, as in Corallochytreia and Ichthyosporea (Mendoza et al. 2002; Marshall and Berbee  
7 2011; Tikhonenkov et al. 2020). The wall thickness, electron-density and amount of reserve  
8 material vary greatly among endospores. Some cells appear active even before exiting the  
9 ruptured parent cell (Fig. 7E), presumably ready to re-infect other haemocytes and tissues in the  
10 same host, as it has been shown for several ichthyosporeans (Arkush et al. 2003; Marshall et al.  
11 2008; Kocan 2019). Other cysts seem to be resistant (Fig. 6D, 6F), perhaps capable of infecting  
12 other amphipods or even remaining viable in the environment for months (Marshall and Berbee  
13 2010; Gozlan et al. 2014; LaPatra and Kocan 2016).

14           The transmission method for *T. philomaios* cells is unknown, as for *C. owczarzaki*  
15 (Harcet et al. 2016), and most parasites in Ichthyosporea (Glockling et al. 2013). A direct cycle  
16 by consumption of infected prey has been demonstrated in the ichthyophonid *I. hofferi* (Kramer-  
17 Schadt et al. 2010), and could be possible for *T. philomaios*, given the high levels of interspecific  
18 predation (Dick et al. 1999), cannibalism (Kinzler and Maier 2003), and scavenging of  
19 conspecifics (Agnew and Moore 1986) observed in amphipods. The thicker ameboid endospores  
20 observed in *T. philomaios* are also remindful of the infective waterborne cells observed in  
21 ichthyophonid parasites (Olson et al. 1991, Andreou et al. 2009, Kocan 2019), which unlike  
22 those in order Dermocystida, lack a flagellum (Mendoza et al. 2002). Additionally, cysts of the  
23 so called “TMS” ichthyosporean infecting *Tenebrio molitor*, persist in the connective tissues  
24 associated to the gonads, and are transmitted with sperm during copulation (Lord et al. 2012).  
25 The presence of few *T. philomaios* cells infecting amphipod gonads throughout the year  
26 (although with low prevalence = 1.9%) leaves open the possibility of a similar “nuptial  
27 transmission” for the novel parasite. In that case, *Echinogammarus* sp. and *Orchestia* sp. would  
28 represent the reservoir for *T. philomaios*, which according to the most extended definition is an  
29 environment/population where the pathogen can be permanently maintained and transmitted  
30 (Haydon et al. 2002).

31           Finally, an indirect transmission cycle has been contemplated as well, given the generalist  
32 infectivity observed in *T. philomaios* and ichthyosporean parasites (Andreou et al. 2012; Rowley  
33 et al. 2013; Combe and Gozlan 2018). Copepods have been proposed as the missing intermediate  
34 host for the fish parasite *I. hofferi*, which infects herring and salmon species (Hershberger et al.  
35 2002; Gregg et al. 2012). Interestingly, harpacticoid copepods are some of the most common  
36 invertebrates co-occurring with amphipods in the upper part of the intertidal in Newton’s Cove,  
37 Camel, Dart and Tamar estuaries (personal observation; Hicks and Coull 1983). However, our  
38 PCR based search for *T. philomaios* in copepods (n = 1300 individuals) was negative, just like  
39 the histopathological analysis. In turn, the results for the turbellarian *Procerodes* sp. were PCR  
40 positive during May. The platyhelminth, which is very common in the north Atlantic, appears to  
41 predate on diseased *Echinogammarus* sp. preys and carcasses (Den Hartog 1968; Taylor 1986),  
42 showing a link and a possible role as intermediate host. A more extensive histopathological  
43 analysis of *Procerodes* sp. will be necessary to substantiate its possible role as intermediate host  
44 of *T. philomaios*. If uninfected the turbellarian could still be a vector helping the dispersal of  
45 viable *T. philomaios* cysts.

## 1 **Distribution, prevalence, and ecological significance**

2 The low number of filasterean species and their rare appearance in environmental samplings  
3 have prevented any previous estimation of their temporal prevalence, as it has been assayed for  
4 larger holozoan clades Ichthyosporea and Choanoflagellata (Marchant and Perrin 1990;  
5 Kasesalu et al. 2000; Pekkarinen and Lotman 2003). The prevalence of *C. owczarzaki* in  
6 *Biomphalaria glabrata* has been observed to vary from 1% to 45% depending on the strain  
7 (Hertel et al. 2002), but the measurement, done on cultured snails, does not estimate occurrence  
8 on a time period. Our study is the first one to reveal a temporal pattern in the abundance of a  
9 filasterean species. The quickly vanishing peak in prevalence observed for *T. philomaios* during  
10 May, exposes seasonality as an until now unaccounted bias for the scarcity of filasterean  
11 sequences in environmental samplings (del Campo et al. 2015; Hehenberger et al. 2017;  
12 Mylnikov et al. 2019). A similar short temporary window in the transmission of *C. owczarzaki*  
13 between snails, could explain, at least partially how it has eluded sampling efforts to find it in the  
14 wild (Ferrer-Bonet and Ruiz-Trillo 2017). Additionally, our failed efforts to amplify the 18S of  
15 *T. philomaios* from filtered water collected in Newton's Cove during May, reinforces the  
16 hypothesis of a reduced detection capability of eDNA for parasites/endosymbionts (Dumonteil et  
17 al. 2018).

18 So far, it has been observed that *T. philomaios* is able to infect at least two different  
19 amphipod genera, indicating certain range of hosts specificity that could expand notably if  
20 infection in the turbellarian *Procerodes* sp. is substantiated by histology. In this study, the  
21 prevalence of *T. philomaios* was as high as 64% (May 2016), with about a third of the infected  
22 individuals presenting heavy infections associated to tissue disruption and haemolymph  
23 congestion by parasitic cells. From the point of view of pathology, other protistan parasites that  
24 tend to multiply and congest the haemolymph of crustacean hosts, such as the dinoflagellate  
25 *Hematodinium* sp. have been associated with a reduced oxygenation capability and diminished  
26 overall fitness (Taylor et al. 1996; Stentiford et al. 2001). The observed unresponsiveness to  
27 stimuli in infected amphipods, is consistent with the systemic damage observed in the tegument,  
28 which functions as the sensorial system (Steele and Oshel 1987). Collectively, numerous  
29 protistan parasites have been found to profoundly alter the populations of amphipods and other  
30 crustaceans (Morado 2011; Ironside and Alexander 2015). Considering that several  
31 ichthyosporean parasites are responsible for important mortality events in fish and amphibian  
32 populations (Raffel et al. 2008; Kirkbright et al. 2016) it would be interesting to monitor the  
33 influence of *T. philomaios* in the amphipod population, as *Echinogammarus* and *Orchestia* are  
34 amongst the most common and abundant crustaceans in coastal ecosystems of Northern Europe  
35 (Marques and Nogueira 1991; Mantzouki et al. 2012), and important invasive species outside the  
36 continent (Van Overdijk et al. 2003; Herkül et al. 2006).

37

## 38 **TAXONOMIC SUMMARY**

39 Eukaryota Chatton, 1925 / Eukarya Margulis and Chapman, 2009: Opisthokonta Adl, 2005:  
40 Holozoa Adl, 2012: Filasterea Shalchian-Tabrizi, 2008: Ministerida Cavalier-Smith, 1997

41

### 42 **Family Txikisporidae Urrutia, Feist & Bass n. fam.**

43 *Diagnosis.* Naked unicellular and uninucleated protists morphologically similar to individuals in  
44 family Ministeriidae Cavalier-Smith 2008, but with a parasitic lifestyle.



1 *Type genus. Txikispora* n. g. (see below)

2 **Genus *Txikispora* Urrutia, Feist & Bass n. g.**

3 *Etymology.* ‘txiki’: small and ‘spora’: a seed (Basque). The name has been chosen to reflect  
4 relatedness with the filasterean endosymbiont *Capsaspora* Hertel, 2002 (“the quick eating seed”)  
5 and its small size, while putting a distance with other small spore forming parasitic lineages with  
6 Latin stems.

7 *Diagnosis.* As for species (see below)

8 *Type species.* *Txikispora philomaios* (see below)

9 ***Txikispora philomaios* Urrutia, Feist & Bass n. sp.**

10 *Etymology.* Txiki-: small, spora: spore, philo-: lover, maios: the month of May. “The little May-  
11 loving spore”, referring to its predominant detection (as a parasite of amphipods) in that month.

12 *Diagnosis.* Virtually spherical monokaryotic stages, with a length of  $2.6 \pm 0.41 \mu\text{m}$  and a width  
13 of  $2.26 \pm 0.34 \mu\text{m}$ . The round and walled multinucleated stage contains four walled cells inside,  
14 which resemble a lot the monokaryotic stages. The size of this divisional stage is slightly bigger  
15 ( $3.17 \mu\text{m} \pm 0.24$  in diameter). Infection develops principally inside host haemocytes and  
16 connective tissues, especially those associated to the tegument. Infection in amphipods in the  
17 southwest of UK occurs consistently during late April and May, the prevalence of the parasite  
18 during the rest of the year is anecdotal ( $< 2\%$ ). The parasite has been also linked to the gonads,  
19 being the only organ that appears to be infected during the rest of the year. There is host reaction  
20 to the parasite in form of melanization and granuloma formation, especially when the parasite  
21 affects the hepatopancreas.

22 *Type host.* Amphipods *Echinogammarus* sp. and *Orchestia* sp.

23 *Type location.* Coastal waters in Newton’s Cove (UK)

24 *Type material.* Original slides used for this paper are stored together with biological material  
25 embedded in wax and epoxy resin in Cefas Weymouth Lab. Type material is stored as RA16020  
26 (specimen no. 19) and RA17028 (specimen no. 53) and (specimen no. 287). The SSU rDNA  
27 sequence is deposited in GenBank under accession number (to be submitted).

28

## 29 **ACKNOWLEDGMENTS**

30 A.U was supported by a PhD studentship grant (Programa Predoctoral de Formación de Personal  
31 Investigador – Departamento de Educación Gobierno Vasco) in collaboration with Ikerbasque;  
32 the experimental work was funded by the UK Department of Environment, Food and Rural  
33 Affairs (Defra) under contracts FC1214 (to D.B) and FB002A (to S.W.F and D.B). IR-T was  
34 supported by a grant (BFU2017-90114-P) from Ministerio de Economía y Competitividad  
35 (MINECO), Agencia Estatal de Investigación (AEI), and Fondo Europeo de Desarrollo Regional  
36 (FEDER). M.M.L. was supported by a Marie Skłodowska-Curie Individual Fellowship under the  
37 EU Framework Programme for Research and Innovation Horizon 2020 (Project ID 747789), and  
38 an Ayuda Juan de la Cierva - Incorporación (IJC2018-036657-I). We thank Matt Green, Rose  
39 Kerr, Dr. Corey Holt, Dr. Georgia Ward, Dr. Selina Church, and Caroline Daumich, who assisted  
40 with sample collection and processing and provided advise.

41

42

43

## 1 LITERATURE CITED

- 2 Agnew, D. J. & Moore, P. G. 1986. The feeding ecology of two littoral amphipods (Crustacea),  
3 *Echinogammarus pirloti* (Sexton & Spooner) and *E. obtusatus* (Dahl). *J. Exp. Mar. Biol.*  
4 *Ecol.*, 103:203-215.
- 5 Amaral-Zettler, L. A., Nerad, T. A., O'Kelly, C. J. & Sogin, M. L. 2001. The nucleariid  
6 amoebae: more protists at the animal-fungal boundary. *J. Eukaryotic Microbiol.*, 48:293-  
7 297.
- 8 Andreou, D., Arkush, K. D., Guégan, J. F. & Gozlan, R. E. 2012. Introduced pathogens and  
9 native freshwater biodiversity: a case study of *Sphaerothecum destruens*. *PLoS One.*, 7,  
10 e36998. doi:10.1371/journal.pone.0036998
- 11 Andreou, D., Gozlan, R. E. & Paley, R. 2009. Temperature influence on production and  
12 longevity of *Sphaerothecum destruens* zoospores. *J. Parasitol.*, 95:1539-1541.
- 13 Andreou, D., Gozlan, R. E., Stone, D., Martin, P., Bateman, K. & Feist, S. W. 2011.  
14 *Sphaerothecum destruens* pathology in cyprinids. *Dis. Aquat. Org.*, 95:145-151.
- 15 Arkush, K. D., Mendoza, L., Adkison, M. A. & Hedrick, R. P. 2003. Observations on the life  
16 stages of *Sphaerothecum destruens* n. g., n. sp., a mesomycetozoean fish pathogen formally  
17 referred to as the rosette agent. *J. Eukaryotic Microbiol.*, 50:430-438.
- 18 Arroyo, A. S., López-Escardó, D., Kim, E., Ruiz-Trillo, I. & Najle, S. R. 2018. Novel diversity  
19 of deeply branching Holomycota and unicellular holozoans revealed by metabarcoding in  
20 Middle Paraná River, Argentina. *Front. Ecol. Evol.*, 6:99.
- 21 Bancroft, J. D. & Cook, H. C. 1994. Manual of Histological Techniques and their Diagnostic  
22 Applications, Churchill Livingstone, New York, NY. p. 40-41.
- 23 Bass D., Tikhonenkov, D. V., Foster, R., Dyal, P., Janouskovec, J., Keeling, P. J., Gardner, M.,  
24 Neuhauser, S., Hartikainen, H., Mylnikov, A. P. & Berney, C. 2018. Rhizarian ‘Novel Clade  
25 10’ revealed as abundant and diverse planktonic and terrestrial flagellates, including  
26 *Aquavolon* n. gen. *J. Eukaryot. Microbiol.*, 65:828-842.
- 27 Bass, D., Yabuki, A., Santini, S., Romac, S. & Berney, C. 2012. Reticulamoeba is a long-  
28 branched Granofilosean (Cercozoa) that is missing from sequence databases. *PLoS One*, 7,  
29 e49090. doi:10.1371/journal.pone.0049090
- 30 Berney, C., Fahrni, J. & Pawlowski, J. 2004. How many novel eukaryotic ‘kingdoms’? Pitfalls  
31 and limitations of environmental DNA surveys. *BMC Biol.*, 2:13.
- 32 Borteiro, C., Baldo, D., Maronna, M. M., Baeta, D., Sabbag, A. F., Kolenc, F., Debat, C. M.,  
33 Haddad, C. F. B., Cruz, J. C., Verdes, J. M. & Ubilla, M. 2018. Amphibian parasites of the  
34 Order Dermocystida (Ichthyosporea): current knowledge, taxonomic review and new  
35 records from Brazil. *Zootaxa*, 4461:499-518.
- 36 Broz, O. & Privora, M. 1952. Two skin parasites of *Rana temporaria*: *Dermocystidium ranae*  
37 Guyénot & Naville and *Dermosporidium granulorum* n. sp. *Parasitology*, 42:65-69.

- 1 Cafaro, M. J. 2005. Eccrinales (Trichomycetes) are not fungi, but a clade of protists at the early  
2 divergence of animals and fungi. *Mol. Phylogenet. Evol.*, 35:21-34.
- 3 Capella-Gutiérrez, S., Silla-Martínez, J. M. & Gabaldón, T. 2009. trimAl: a tool for automated  
4 alignment trimming in large-scale phylogenetic analyses. *Bioinformatics*, 25:1972-1973.
- 5 Cavalier-Smith, T. 1987. The simultaneous symbiotic origin of mitochondria, chloroplasts, and  
6 microbodies. *Ann. N. Y. Acad. Sci.*, 503:55-71.
- 7 Cavalier-Smith, T. 1993. Kingdom protozoa and its 18 phyla. *Microbiol. Mol. Biol. Rev.*, 57:953-  
8 994.
- 9 Cavalier-Smith, T. & Chao, E. E. 1995. The opalozoan *Apusomonas* is related to the common  
10 ancestor of animals, fungi, and choanoflagellates. *Proc. R. Soc. London, Ser. B*, 261:1-6.
- 11 Cavalier-Smith, T. & Chao, E. E. Y. 2003. Phylogeny of choanozoa, apusozoa, and other  
12 protozoa and early eukaryote megaevolution. *J. Mol. Evol.*, 56:540-563.
- 13 Cavalier-Smith, T. 2004. Only six kingdoms of life. *Proc. R. Soc. London, Ser. B*, 271:1251-  
14 1262.
- 15 Colley, D. G., Bustinduy, A. L., Secor, W. E. & King, C. H. 2014. Human schistosomiasis.  
16 *Lancet*, 383:2253-2264.
- 17 Combe, M. & Gozlan, R. E. 2018. The rise of the rosette agent in Europe: An epidemiological  
18 enigma. *Transboundary Emerging Dis.*, 65:1474-1481.
- 19 Dayel, M. J. & King, N. 2014. Prey capture and phagocytosis in the choanoflagellate  
20 *Salpingoeca rosetta*. *PLoS One*, 9, e95577. doi:10.1371/journal.pone.0095577
- 21 de Melo, E. J. T. & de Souza, W. 1992. Penetration of *Toxoplasma gondii* into host cells induces  
22 changes in the distribution of the mitochondria and the endoplasmic reticulum. *Cell Struct.*  
23 *Funct.*, 17:311-317.
- 24 del Campo, J. & Ruiz-Trillo, I. 2013. Environmental survey meta-analysis reveals hidden  
25 diversity among unicellular opisthokonts. *Mol. Biol. Evol.*, 30:802-805.
- 26 del Campo, J., Mallo, D., Massana, R., de Vargas, C., Richards, T. A. & Ruiz-Trillo, I. 2015.  
27 Diversity and distribution of unicellular opisthokonts along the European coast analysed  
28 using high-throughput sequencing. *Environ. Microbiol.*, 17:3195-3207.
- 29 Den Hartog, C. 1968. Marine triclads from the Plymouth area. *J. Mar. Biol. Assoc. U. K.*,  
30 48:209-223.
- 31 Dick, J. T., Montgomery, W. I. & Elwood, R. W. 1999. Intraguild predation may explain an  
32 amphipod replacement: evidence from laboratory populations. *J. Zool.*, 249:463-468.
- 33 Dumonteil, E., Ramirez-Sierra, M. J., Pérez-Carrillo, S., Teh-Poot, C., Herrera, C., Gourbière, S.  
34 & Waleckx, E. 2018. Detailed ecological associations of triatomines revealed by  
35 metabarcoding and next-generation sequencing: implications for triatomine behavior and  
36 *Trypanosoma cruzi* transmission cycles. *Sci. Rep.*, 8:1-13.

- 1 Eveland, L. K. & Haseeb, M. A. 2011. Laboratory rearing of *Biomphalaria glabrata* snails and  
2 maintenance of larval schistosomes in vivo and in vitro. *In: Toledo, R. & Fried, B. (ed.),*  
3 *Biomphalaria snails and larval trematodes.* Springer, New York, NY. p. 33-35
- 4 Fagotti, A., Rossi, R., Paracucchi, R., Lucentini, L., Simoncelli, F. & Di Rosa, I. 2020.  
5 Developmental stages of *Amphibiocystidium* sp., a parasite from the Italian stream frog  
6 (*Rana italica*). *Zoology (Jena)*, 141, e125813. doi:10.1016/j.zool.2020.125813
- 7 Feist, S. W., Hine, P. M., Bateman, K. S., Stentiford, G. D. & Longshaw, M. 2009.  
8 *Paramarteilia canceri* sp. n. (Cercozoa) in the European edible crab (*Cancer pagurus*) with  
9 a proposal for the revision of the order Paramyxida Chatton, 1911. *Folia Parasitol.*, 56:73.
- 10 Ferrer-Bonet, M. & Ruiz-Trillo, I. 2017. *Capsaspora owczarzaki*. *Curr. Biol.*, 27:829-830.
- 11 Fredricks, D. N., Jolley, J. A., Lepp, P. W., Kosek, J. C. & Relman, D. A. 2000. *Rhinosporidium*  
12 *seeberi*: a human pathogen from a novel group of aquatic protistan parasites. *Emerging*  
13 *Infect. Dis.*, 6:273
- 14 Glockling, S. L., Marshall, W. L. & Gleason, F. H. 2013. Phylogenetic interpretations and  
15 ecological potentials of the Mesomycetozoa (Ichthyosporea). *Fungal Ecol.*, 6:237-247.
- 16 González-Hernández, M., Denoël, M., Duffus, A. J., Garner, T. W., Cunningham, A. A. &  
17 Acevedo-Whitehouse, K. 2010. Dermocystid infection and associated skin lesions in free-  
18 living palmate newts (*Lissotriton helveticus*) from Southern France. *Parasitol. Int.*, 59:344-  
19 350.
- 20 Gouy, M., Guindon, S. & Gascuel, O. 2010. SeaView version 4: a multiplatform graphical user  
21 interface for sequence alignment and phylogenetic tree building. *Mol. Biol. Evol.*, 27:221-  
22 224.
- 23 Gozlan, R. E., Marshall, W., Lilje, O., Jessop, C., Gleason, F. H. & Andreou, D. 2014. Current  
24 ecological understanding of fungal-like pathogens of fish: what lies beneath? *Front.*  
25 *Microbiol.*, 5:62.
- 26 Grau-Bove, X., Torruella, G., Donachie, S., Suga, H., Leonard, G., Richards, T. A. & Ruiz-  
27 Trillo, I. 2017. Dynamics of genomic innovation in the unicellular ancestry of animals.  
28 *eLife*, 6, e26036. doi:10.7554/eLife.26036.
- 29 Gregg J., Grady C., Friedman C. & Hershberger P. 2012. Inability to demonstrate fish-to-fish  
30 transmission of *Ichthyophonus* from laboratory infected Pacific Herring *Clupea pallasii* to  
31 naïve conspecifics. *Dis. Aquat. Org.*, 99:139-144.
- 32 Harcet, M., Lopez-Escardo, D., Sebe-Pedros, A. & Ruiz-Trillo, I. 2016. Predatory capabilities of  
33 the filasterean *Capsaspora owczarzaki* reveals its potential for a free-living lifestyle.  
34 *Protistology*, 10:26
- 35 Hartikainen, H., Bass, D., Briscoe, A. G., Knipe, H., Green, A. J. & Okamura, B. 2016.  
36 Assessing myxozoan presence and diversity using environmental DNA. *Int. J. Parasitol.*,  
37 46:781-792.

- 1 Hassett, B. T., López, J. A. & Gradinger, R. 2015. Two new species of marine saprotrophic  
2 sphaeroformids in the Mesomycetozoea isolated from the sub-Arctic Bering  
3 Sea. *Protist*, 166:310-322.
- 4 Haydon, D. T., Cleaveland, S., Taylor, L. H. & Laurenson, M. K. 2002. Identifying reservoirs of  
5 infection: a conceptual and practical challenge. *Emerging Infect. Dis.*, 8:1468-1473.
- 6 Heger, T. J., Giesbrecht, I. J., Gustavsen, J., del Campo, J., Kellogg, C. T., Hoffman, K. M.,  
7 Lertzman, K., Mohn, W. W. & Keeling, P. J. 2018. High-throughput environmental  
8 sequencing reveals high diversity of litter and moss associated protist communities along a  
9 gradient of drainage and tree productivity. *Environ. Microbiol.*, 20:1185-1203.
- 10 Hehenberger, E., Tikhonenkov, D. V., Kolisko, M., Del Campo, J., Esaulov, A. S., Mylnikov, A.  
11 P. & Keeling, P. J. 2017. Novel predators reshape holozoan phylogeny and reveal the  
12 presence of a two-component signaling system in the ancestor of animals. *Curr. Biol.*,  
13 27:2043-2050.
- 14 Herkül, K., Kotta, J. & Kotta, I. 2006. Distribution and population characteristics of the alien  
15 talitrid amphipod *Orchestia cavimana* in relation to environmental conditions in the  
16 Northeastern Baltic Sea. *Helgol. Mar. Res.*, 60:121.
- 17 Hershberger, P. K., Stick, K., Bui, B., Carroll, C., Fall, B., Mork, C., Perry, J. A., Sweeney, E.,  
18 Wittouck, Winton, J. & Kocan, R. 2002. Incidence of *Ichthyophonus hoferi* in Puget Sound  
19 fishes and its increase with age of Pacific herring. *J. Aquat. Anim. Health*, 14:50-56.
- 20 Hertel, L. A., Barbosa, C. S., Santos, R. A. L. & Loker, E. S. 2004. Molecular identification of  
21 symbionts from the pulmonate snail *Biomphalaria glabrata* in Brazil. *J. Parasitol.*, 90:759-  
22 763.
- 23 Hertel, L. A., Bayne, C. J. & Loker, E. S. 2002. The symbiont *Capsaspora owczarzaki*, nov. gen.  
24 nov. sp., isolated from three strains of the pulmonate snail *Biomphalaria glabrata* is related  
25 to members of the Mesomycetozoea. *Int. J. Parasitol.*, 32:1183-1191.
- 26 Hibberd, D. 1975. Observations on the ultrastructure of the choanoflagellate *Codosiga botrytis*  
27 Saville-Kent with special reference to the flagellar apparatus. *J. Cell Sci.*, 17:191-219.
- 28 Hicks, G. F. & Coull, B. C. 1983. The ecology of marine meiobenthic harpacticoid copepods.  
29 *Oceanogr. Mar. Biol.*, 21:67-175.
- 30 Holzer, A. S., Bartošová-Sojková, P., Born-Torrijos, A., Lövy, A., Hartigan, A. & Fiala, I. 2018.  
31 The joint evolution of the Myxozoa and their alternate hosts: a cnidarian recipe for success  
32 and vast biodiversity. *Mol. Ecol.*, 27:1651-1666.
- 33 Hopwood, D. 1969. Fixatives and fixation: a review. *Histochem J.*, 1:323-360.
- 34 Ironside, J. E. & Alexander, J. 2015. Microsporidian parasites feminise hosts without  
35 paramyxean co-infection: support for convergent evolution of parasitic feminisation. *Int. J.*  
36 *Parasit.*, 45:427-433.
- 37 James-Clark, H. 1868. On the Spongiae ciliatae as Infusoria flagellata; Or observations on the  
38 structure, animality, and relationship of *Leucosolenia botryoides*, Bowerbank. *Ann. Mag.*  
39 *Nat. Hist.*, 1:188-215.

- 1 Johnson, D. S. & Heard, R. 2017. Bottom-up control of parasites. *Ecosphere*, 8, e01885.  
2 doi:10.1002/ecs2.1885
- 3 Kalyaanamoorthy, S., Minh, B. Q., Wong, T. K., von Haeseler, A. & Jermiin, L. S. 2017.  
4 ModelFinder: fast model selection for accurate phylogenetic estimates. *Nat. methods*,  
5 14:587-589.
- 6 Karpov, S., Mamkaeva, M. A., Aleoshin, V., Nasonova, E., Lilje, O. & Gleason, F. H. 2014.  
7 Morphology, phylogeny, and ecology of the aphelids (Aphelidea, Opisthokonta) and  
8 proposal for the new superphylum Opisthosporidia. *Front. Microbiol.*, 5:112.
- 9 Karst, S. M., Dueholm, M. S., McIlroy, S. J., Kirkegaard, R. H., Nielsen, P. H. & Albertsen, M.  
10 2018. Retrieval of a million high-quality, full-length microbial 16S and 18S rRNA gene  
11 sequences without primer bias. *Nat. Biotechnol.*, 36:190.
- 12 Karst, S. M., Dueholm, M. S., McIlroy, S. J., Kirkegaard, R. H., Nielsen, P. H. & Albertsen, M.  
13 2016. Thousands of primer-free, high-quality, full-length SSU rRNA sequences from all  
14 domains of life. *BioRxiv*, 070771. doi:10.1101/070771
- 15 Kasesalu, J., Laius, A. & Lotman, K. 2000. The occurrence and species composition of parasites  
16 of the genus *Dermocystidium* in Estonian fish farms and some natural water bodies.  
17 *Agraarteadus*, 11:205-212.
- 18 Katoh, K., Rozewicki, J. & Yamada, K. D. 2019. MAFFT online service: multiple sequence  
19 alignment, interactive sequence choice and visualization. *Briefings Bioinf.*, 20:1160-1166.
- 20 Keeling, P. J. 2004. Reduction and compaction in the genome of the apicomplexan parasite  
21 *Cryptosporidium parvum*. *Dev. Cell*, 6:614-616.
- 22 Keeling, P. J. & Fast, N. M. 2002. Microsporidia: biology and evolution of highly reduced  
23 intracellular parasites. *Annu Rev. Microbiol.*, 56:93-116.
- 24 King, N. 2004. The unicellular ancestry of animal development. *Dev. Cell*, 7:313-325.
- 25 King, N. 2005. Choanoflagellates. *Curr. Biol.*, 15:113-114.
- 26 Kinzler, W. & Maier, G. 2003. Asymmetry in mutual predation: possible reason for the  
27 replacement of native gammarids by invasives. *Arch. Hydrobiol.*, 157:473-481.
- 28 Kirkbright, D., Huber, P., Lillie, B. N. & Lumsden, J. S. 2016. Dermocystidium-like organism  
29 linked with a mortality event in Yellow Perch *Perca flavescens* (Mitchill) in Ontario,  
30 Canada. *J. Fish Dis.*, 39:597-601.
- 31 Kocan, R. M. 2019. Transmission models for the fish pathogen *Ichthyophonus*: synthesis of field  
32 observations and empirical studies. *Can. J. Fish. Aquat. Sci.*, 76:636-642.
- 33 Kramer-Schadt, S., Holst, J. C. & Skagen, D. 2010. Analysis of variables associated with the  
34 *Ichthyophonus hoferi* epizootics in Norwegian spring spawning herring, 1992–2008. *Can. J.*  
35 *Fish. Aquat. Sci.*, 67:1862-1873.
- 36 Lagrue, C., Heaphy, K., Presswell, B. & Poulin, R. 2016. Strong association between parasitism  
37 and phenotypic variation in a supralittoral amphipod. *Mar. Ecol.: Prog. Ser.*, 553:111-123.

- 1 LaPatra, S. E. & Kocan, R. M. 2016. Infected donor biomass and active feeding increase  
2 waterborne transmission of *Ichthyophonus* sp. to Rainbow trout sentinels. *J. Aquat. Anim.*  
3 *Health*, 28:107-113.
- 4 Laval, M. 1971. Ultrastructure et mode de nutrition du choanoflagellé *Salpingoeca pelagica*, sp.  
5 nov. Comparaison avec les choanocytes des spongiaires. *Protistologica*, 7:325-336.
- 6 Leander, B. S., Lloyd, S. A., Marshall, W. & Landers, S. C. 2006. Phylogeny of marine  
7 gregarines (Apicomplexa) - *Pterospora*, *Lithocystis* and *Lankesteria* - and the origin(s) of  
8 coelomic parasitism. *Protist*, 157:45-60.
- 9 Lefèvre, T., Lebarbenchon, C., Gauthier-Clerc, M., Misse, D., Poulin, R. & Thomas, F. 2009.  
10 The ecological significance of manipulative parasites. *Trends Ecol. Evol.*, 24:41-48.
- 11 López-Escardó, D., Grau-Bové, X., Guillaumet-Adkins, A., Gut, M., Sieracki, M. E. & Ruiz-  
12 Trillo, I. 2019. Reconstruction of protein domain evolution using single-cell amplified  
13 genomes of uncultured choanoflagellates sheds light on the origin of animals. *Philos. Trans.*  
14 *R. Soc., B*, 374:20190088.
- 15 Lord, J. C., Hartzler, K. L. & Kambhampati, S. 2012. A nuptially transmitted ichthyosporean  
16 symbiont of *Tenebrio molitor* (Coleoptera: Tenebrionidae). *J. Eukaryotic Microbiol.*,  
17 59:246-250.
- 18 Lotman, K., Pekkarinen, M. & Kasesalu, J. 2000. Morphological observations on the life cycle of  
19 *Dermocystidium cyprini* Cervinka and Lom, 1974, parasitic in carps (*Cyprinus carpio*). *Acta*  
20 *Protozool.*, 39:125-134.
- 21 Mah, J. L., Christensen-Dalsgaard, K. K. & Leys, S. P. 2014. Choanoflagellate and choanocyte  
22 collar-flagellar systems and the assumption of homology. *Evol. Dev.*, 16:25-37.
- 23 Mantzouki, E., Ysnel, F., Carpentier, A. & Pétillon, J. 2012. Accuracy of pitfall traps for  
24 monitoring populations of the amphipod *Orchestia gammarella* (Pallas 1766) in  
25 saltmarshes. *Estuarine, Coastal Shelf Sci.*, 113:314-316.
- 26 Marchant, H. J. & Perrin, R. A. 1990. Seasonal variation in abundance and species composition  
27 of choanoflagellates (Acanthoecidae) at Antarctic coastal sites. *Polar Biol.*, 10:499-505.
- 28 Marques, J. C. & Nogueira, A. 1991. Life cycle, dynamics, and production of *Echinogammarus*  
29 *marinus* Leach (Amphipoda) in the Mondego estuary (Portugal). *Oceanol. Acta*, Special  
30 issue.
- 31 Marshall, W. L. & Berbee, M. L. 2010. Population-level analyses indirectly reveal cryptic sex  
32 and life history traits of *Pseudoperkinsus tapetis* (Ichthyosporea, Opisthokonta): a  
33 unicellular relative of the animals. *Mol. Biol. Evol.*, 27:2014-2026.
- 34 Marshall, W. L. & Berbee, M. L. 2011. Facing unknowns: living cultures (*Pirum gemmata* gen.  
35 nov., sp. nov., and *Abeoforma whisleri*, gen. nov., sp. nov.) from invertebrate digestive  
36 tracts represent an undescribed clade within the unicellular Opisthokont lineage  
37 Ichthyosporea (Mesomycetozoa). *Protist*, 162:33-57.
- 38 Marshall, W. L., Celio, G., McLaughlin, D. J. & Berbee, M. L. 2008. Multiple isolations of a  
39 culturable, motile Ichthyosporean (Mesomycetozoa, Opisthokonta), *Creolimax*

- 1 *fragrantissima* n. gen., n. sp., from marine invertebrate digestive tracts. *Protist*, 159: 415-  
2 433.
- 3 Mendoza, L., Taylor, J. W. & Ajello, L. 2002. The Class Mesomycetozoa: a heterogeneous  
4 group of microorganisms at the animal-fungal boundary. *Annu. Rev. Microbiol.*, 56:315-  
5 344.
- 6 Minh, B. Q., Nguyen, M. A. T. & von Haeseler, A. 2013. Ultrafast approximation for  
7 phylogenetic bootstrap. *Mol. Biol. Evol.*, 30:1188-1195.
- 8 Molnár, K. & Székely, C. 2014. Tissue preference of some myxobolids (Myxozoa: Myxosporae)  
9 from the musculature of European freshwater fishes. *Dis. Aquat. Org.*, 107:191-198.
- 10 Morado, J. F. 2011. Protistan diseases of commercially important crabs: a review. *J. Invertebr.*  
11 *Pathol.*, 106:27-53.
- 12 Morgan, J. A., DeJong, R. J., Jung, Y., Khallaayoune, K., Kock, S., Mkoji, G. M. & Loker, E. S.  
13 2002. A phylogeny of planorbid snails, with implications for the evolution of *Schistosoma*  
14 parasites. *Mol. Phylogenet. Evol.*, 25:477-488.
- 15 Mylnikov, A. P., Tikhonenkov, D. V., Karpov, S. A. & Wylezich, C. 2019. Microscopical  
16 Studies on *Ministeria vibrans* Tong, 1997 (Filasterea) Highlight the Cytoskeletal Structure  
17 of the Common Ancestor of Filasterea, Metazoa and Choanoflagellata. *Protist*, 170:385-  
18 396.
- 19 Nguyen, L. T., Schmidt, H. A., Von Haeseler, A. & Minh, B. Q. 2015. IQ-TREE: a fast and  
20 effective stochastic algorithm for estimating maximum-likelihood phylogenies. *Mol. Biol.*  
21 *Evol.*, 32:268-274.
- 22 Olson, R. E., Dungan, C. F. & Holt, R. A. 1991. Water-borne transmission of *Dermocystidium*  
23 *salmonis* in the laboratory. *Dis. Aquat. Org.*, 12:41-48.
- 24 Owczarzak, A., Stibbs, H. H. & Bayne, C. J. 1980. The destruction of *Schistosoma mansoni*  
25 mother sporocysts in vitro by amoebae isolated from *Biomphalaria glabrata*: an  
26 ultrastructural study. *J. Invertebr. Pathol.*, 35:26-33.
- 27 Paps, J., Medina-Chacón, L. A., Marshall, W., Suga, H. & Ruiz-Trillo, I. 2013. Molecular  
28 phylogeny of unikonts: new insights into the position of apusomonads and ancyromonads  
29 and the internal relationships of opisthokonts. *Protist*, 164:2-12.
- 30 Paps, J. 2018. What makes an animal? The molecular quest for the origin of the animal kingdom.  
31 *Integr. Comp. Biol.*, 58:654-665.
- 32 Parra-Acero, H., Ros-Rocher, N., Perez-Posada, A., Kożyczkowska, A., Sánchez-Pons, N.,  
33 Nakata, A., Suga, H., Najle, S. R. & Ruiz-Trillo, I. 2018. Transfection of *Capsaspora*  
34 *owczarzaki*, a close unicellular relative of animals. *Development*, 145, e162107.  
35 doi:10.1242/dev.162107
- 36 Patterson, D. J., Nygaard, K., Steinberg, G. & Turley, C. M. 1993. Heterotrophic flagellates and  
37 other protists associated with oceanic detritus throughout the water column in the mid North  
38 Atlantic. *J. Mar. Biol. Assoc. U. K.*, 73:67-95.



- 1 Pekkariinen, M., Lom, J., Murphy, C. A., Ragan, M. A. & Dykova, I. 2003. Phylogenetic position  
2 and ultrastructure of two *Dermocystidium* species (Ichthyosporaea) from the common perch  
3 (*Perca fluviatilis*). *Acta Protozool.*, 42:287-307.
- 4 Pekkariinen, M. & Lotman, K. 2003. Occurrence and life cycles of *Dermocystidium* species  
5 (Mesomycetozoa) in the perch (*Perca fluviatilis*) and ruff (*Gymnocephalus cernuus*)(Pisces:  
6 Perciformes) in Finland and Estonia. *J. Nat. Hist.*, 37:1155-1172.
- 7 Pereira, C. N., Di Rosa, I., Fagotti, A., Simoncelli, F., Pascolini, R. & Mendoza, L. 2005. The  
8 pathogen of frogs *Amphibiocystidium ranae* is a member of the order Dermocystida in the  
9 class Mesomycetozoea. *J. Clin. Microbiol.*, 43:192-198.
- 10 Raffel, T. R., Bommarito, T., Barry, D. S., Witiak, S. M. & Shackelton, L. A. 2008. Widespread  
11 infection of the Eastern red-spotted newt (*Notophthalmus viridescens*) by a new species of  
12 *Amphibiocystidium*, a genus of fungus-like mesomycetozoan parasites not previously  
13 reported in North America. *Parasitology*, 135:203.
- 14 Ragan, M. A., Goggin, C. L., Cawthorn, R. J., Cerenius, L., Jamieson, A. V., Plourde, S. M.,  
15 Rand, T. G., Söderhäll, K. & Gutell, R. R. 1996. A novel clade of protistan parasites near  
16 the animal-fungal divergence. *Proc. Natl. Acad. Sci. U. S. A.*, 93:11907-11912.
- 17 Raghu-Kumar, S. 1987. Occurrence of the thraustochytrid, *Corallochytrium limacisporum* gen.  
18 et sp. nov. in the coral reef lagoons of the Lakshadweep Islands in the Arabian Sea. *Bot.*  
19 *Mar.*, 30:83-90.
- 20 Rambaut, A. 2017. FigTree v. 1.4.3, a graphical viewer of phylogenetic trees. Software in:  
21 <http://tree.bio.ed.ac.uk/software/figtree>.
- 22 Reynolds, E. S. 1963. The use of lead citrate at high pH as an electron-opaque stain in electron  
23 microscopy. *J. Cell Biol.*, 17:208.
- 24 Richter, D. J., Fozouni, P., Eisen, M. B. & King, N. 2018. Gene family innovation, conservation  
25 and loss on the animal stem lineage. *eLife*, 7, e34226. doi:10.7554/eLife.34226
- 26 Ronquist, F., Teslenko, M., Van Der Mark, P., Ayres, D. L., Darling, A., Höhna, S., Larget, B.,  
27 Liu, L., Suchard, M. & Huelsenbeck, J. P. 2012. MrBayes 3.2: efficient Bayesian  
28 phylogenetic inference and model choice across a large model space. *Syst. Biol.*, 61:539-  
29 542.
- 30 Rowley, J. J., Gleason, F. H., Andreou, D., Marshall, W. L., Lilje, O. & Gozlan, R. 2013.  
31 Impacts of mesomycetozoan parasites on amphibian and freshwater fish populations.  
32 *Fungal Biol. Rev.*, 27:100-111.
- 33 Ruiz-Trillo, I., Inagaki, Y., Davis, L. A., Sperstad, S., Landfald, B. & Roger, A. J. 2004.  
34 *Capsaspora owczarzaki* is an independent opisthokont lineage. *Curr. Biol.*, 14:946-947.
- 35 Ruiz-Trillo, I., Lane, C. E., Archibald, J. M. & Roger, A. J. 2006. Insights into the evolutionary  
36 origin and genome architecture of the unicellular opisthokonts *Capsaspora owczarzaki* and  
37 *Sphaeroforma arctica*. *J. Eukaryotic Microbiol.*, 53:379-384.
- 38 Ruiz-Trillo, I., Roger, A. J., Burger, G., Gray, M. W. & Lang, B. F. 2008. A phylogenomic  
39 investigation into the origin of metazoa. *Mol. Biol. Evol.*, 25:664-672.

- 1 Sambrook, J., Fritsch, E. F. & Maniatis, T. 1989. Molecular cloning: a laboratory manual. 2nd  
2 ed. Cold Spring Harbor Laboratory Press, New York, NY. p. 21-152.
- 3 Scott, J. J., Budsberg, K. J., Suen, G., Wixon, D. L., Balser, T. C. & Currie, C. R. 2010.  
4 Microbial community structure of leaf-cutter ant fungus gardens and refuse dumps. *PLoS*  
5 *One*, 5, e9922. doi:10.1371/journal.pone.0009922
- 6 Sebé-Pedrós, A., Burkhardt, P., Sánchez-Pons, N., Fairclough, S. R., Lang, B. F., King, N. &  
7 Ruiz-Trillo, I. 2013. Insights into the origin of metazoan filopodia and microvilli. *Mol. Biol.*  
8 *Evol.*, 30:2013-2023.
- 9 Sebé-Pedrós, A., Degnan, B. M. & Ruiz-Trillo, I. 2017. The origin of Metazoa: a unicellular  
10 perspective. *Nat. Rev. Genet.*, 18:498.
- 11 Shalchian-Tabrizi, K., Minge, M. A., Espelund, M., Orr, R., Ruden, T., Jakobsen, K. S. &  
12 Cavalier-Smith, T. 2008. Multigene phylogeny of choanozoa and the origin of animals.  
13 *PLoS One*, 3, e2098. doi:10.1371/journal.pone.0002098
- 14 Shanan, S., Abd, H., Bayoumi, M., Saeed, A. & Sandström, G. 2015. Prevalence of protozoa  
15 species in drinking and environmental water sources in Sudan. *BioMed Res. Int.*, 2015,  
16 e345619. doi:10.1155/2015/345619
- 17 Silva, V., Pereira, C. N., Ajello, L. & Mendoza, L. 2005. Molecular evidence for multiple host-  
18 specific strains in the genus *Rhinosporidium*. *J. Clin. Microbiol.*, 43:1865-1868.
- 19 Simion, P., Philippe, H., Baurain, D., Jager, M., Richter, D. J., Di Franco, A., Roure, B., Satoh,  
20 N., Quéinnec, E., Ereskovsky, A., Lapébie, P., Corre, E., Delsuc, F., King, N., Wörheide,  
21 G. & Manuel, M. P. 2017. A large and consistent phylogenomic dataset supports sponges as  
22 the sister group to all other animals. *Curr. Biol.*, 27:958-967.
- 23 Snell, E. A., Furlong, R. F. & Holland, P. W. 2001. Hsp70 sequences indicate that  
24 choanoflagellates are closely related to animals. *Curr. Biol.*, 11:967-970.
- 25 Spanggaard, B. & Huss, H. H. 1996. Growth of the fish parasite *Ichthyophonus hoferi* under food  
26 relevant conditions. *Int. J. Food Sci. Technol.*, 31:427-432.
- 27 Speer, C. A., Dubey, J. P., McAllister, M. M. & Blixt, J. A. 1999. Comparative ultrastructure of  
28 tachyzoites, bradyzoites, and tissue cysts of *Neospora caninum* and *Toxoplasma gondii*. *Int.*  
29 *J. Parasitol.*, 29:1509-1519.
- 30 Stamatakis, A. 2014. RAxML version 8: a tool for phylogenetic analysis and post-analysis of  
31 large phylogenies. *Bioinformatics*, 30:1312-1313.
- 32 Steele, V. J. & Oshel, P. E. 1987. The ultrastructure of an integumental microtrich sensillum in  
33 *Gammarus setosus* (Amphipoda). *J. Crustacean Biol.*, 7:45-59.
- 34 Steenkamp, E. T., Wright, J. & Baldauf, S. L. 2006. The protistan origins of animals and fungi.  
35 *Mol. Biol. Evol.*, 23:93-106.
- 36 Stentiford, G. D. & Shields, J. D. 2005. A review of the parasitic dinoflagellates *Hematodinium*  
37 species and *Hematodinium*-like infections in marine crustaceans. *Dis. Aquat. Org.*, 66:47-  
38 70.

- 1 Stentiford, G. D., Bateman, K. S., Feist, S. W., Chambers, E. & Stone, D. M. 2013. Plastic  
2 parasites: extreme dimorphism creates a taxonomic conundrum in the phylum  
3 Microsporidia. *Int. J. Parasitol.*, 43:339-352.
- 4 Stentiford, G. D., Neil, D. M. & Atkinson, R. J. A. 2001. Alteration of burrow-related behaviour  
5 of the Norway lobster, *Nephrops norvegicus* during infection by the parasitic dinoflagellate  
6 *Hematodinium*. *Mar. Freshwater Behav. Physiol.*, 34:139-156.
- 7 Stibbs, H. H., Owczarzak, A., Bayne, C. J. & DeWan, P. (1979). Schistosome sporocyst-killing  
8 amoebae isolated from *Biomphalaria glabrata*. *J. Invertebr. Pathol.*, 33:159-170.
- 9 Suga, H., Chen, Z., De Mendoza, A., Sebé-Pedrós, A., Brown, M. W., Kramer, E., Carr, M.,  
10 Kerner, P., Vervoort, M., Sánchez-Pons, N., Torruella, G., Derelle, R., Manning, G., Lang,  
11 B. F., Russ, C., Haas, B.J., Roger, A. J., Nusbaum, C. & Ruiz-Trillo, I. 2013. The  
12 *Capsaspora* genome reveals a complex unicellular prehistory of animals. *Nat. Commun.*, 4,  
13 e2325. doi:10.1038/ncomms3325
- 14 Taylor, A. C. 1986. Seasonal and diel variations of some physico-chemical parameters of  
15 boulder shore habitats. *Ophelia*, 25:83-95.
- 16 Taylor, A. C., Field, R. H. & Parslow-Williams, P. J. 1996. The effects of *Hematodinium* sp.  
17 infection on aspects of the respiratory physiology of the Norway lobster, *Nephrops*  
18 *norvegicus* (L.). *J. Exp. Mar. Biol. Ecol.*, 207:217-228.
- 19 Tikhonenkov, D. V., Hehenberger, E., Esaulov, A. S., Belyakova, O. I., Mazei, Y. A., Mylnikov,  
20 A. P. & Keeling, P. J. 2020. Insights into the origin of metazoan multicellularity from  
21 predatory unicellular relatives of animals. *BMC Biol.*, 18:1-24.
- 22 Tong, S. M. 1997. Heterotrophic flagellates and other protists from Southampton Water, UK.  
23 *Ophelia*, 47:71-131.
- 24 Torruella, G., de Mendoza, A., Grau-Bové, X., Anto, M., Chaplin, M. A., del Campo, J., Eme,  
25 L., Pérez-Cordón, G., Whipps, C. M., Nichols, K. M., Paley, R., Roger, A. J., Sitjà-  
26 Bobadilla, A., Donachie, S. & Ruiz-Trillo, I. 2015. Phylogenomics reveals convergent  
27 evolution of lifestyles in close relatives of animals and fungi. *Curr. Biol.*, 25:2404-2410.
- 28 Torruella, G., Derelle, R., Paps, J., Lang, B. F., Roger, A. J., Shalchian-Tabrizi, K. & Ruiz-  
29 Trillo, I. 2012. Phylogenetic relationships within the Opisthokonta based on phylogenomic  
30 analyses of conserved single-copy protein domains. *Mol. Biol. Evol.*, 29:531-544.
- 31 Urrutia, A., Bass, D., Ward, G., Ross, S., Bojko, J., Marigomez, I. & Feist, S. W. 2019.  
32 Ultrastructure, phylogeny, and histopathology of two novel haplosporidians parasitising  
33 amphipods, and importance of crustaceans as hosts. *Dis. Aquat. Org.*, 136:87-103.
- 34 Van Overdijk, C. D., Grigorovich, I. A., Mabee, T., Ray, W. J., Ciborowski, J. J. & Macisaac, H.  
35 J. 2003. Microhabitat selection by the invasive amphipod *Echinogammarus ischnus* and  
36 native *Gammarus fasciatus* in laboratory experiments and in Lake Erie. *Freshwater Biol.*,  
37 48:567-578.
- 38 Vilela, R. & Mendoza, L. 2012. The taxonomy and phylogenetics of the human and animal  
39 pathogen *Rhinosporidium seeberi*: a critical review. *Rev. Iberoam. Micol.*, 29:185-199.

- 1 Wainright, P. O., Hinkle, G., Sogin, M. L. & Stickel, S. K. 1993. Monophyletic origins of the  
2 metazoa: an evolutionary link with fungi. *Science*, 260:340-342.
- 3 Wilhelm, R. C., Hanson, B. T., Chandra, S. & Madsen, E. 2018. Community dynamics and  
4 functional characteristics of naphthalene-degrading populations in contaminated surface  
5 sediments and hypoxic/anoxic groundwater. *Environ. Microbiol.*, 20:3543-3559.
- 6 Zhang, Z., Schwartz, S., Wagner, L. & Miller, W. 2000. A greedy algorithm for aligning DNA  
7 sequences. *J. Comput. Biol.*, 7:203-214.
- 8 Zíková, A., Hampl, V., Paris, Z., Týč, J. & Lukeš, J. 2016. Aerobic mitochondria of parasitic  
9 protists: Diverse genomes and complex functions. *Mol. Biochem. Parasitol.*, 209:46-57.

1 **FIGURES**

2

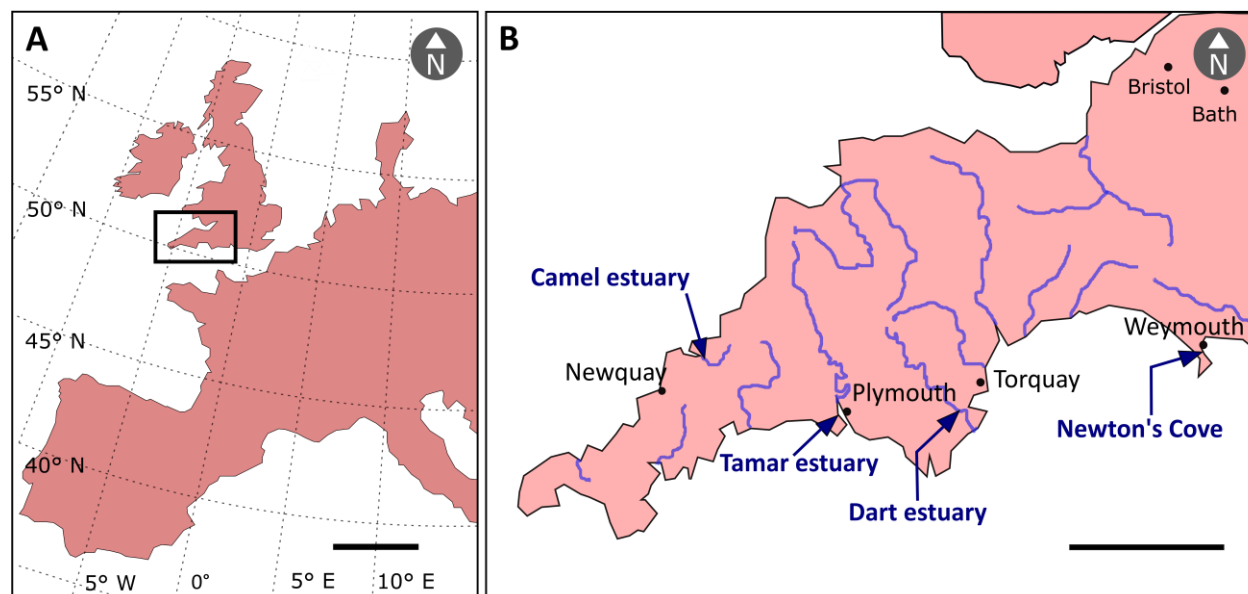

8  
9  
10  
11  
12  
13  
14  
15  
16  
17  
18  
19  
20  
21

**Fig. 1.** Map showing the coastal locations in which amphipods of the genera *Echinogammarus*, *Orchestia*, *Melita* and *Gammarus* were collected. **A.** Western Europe, the black rectangle showing the area of UK sampled. **B.** Area contained within the black rectangle (A). The blue lines show the rivers and estuaries; arrows indicate the sampling locations. Precise coordinates of the locations (Table 1).

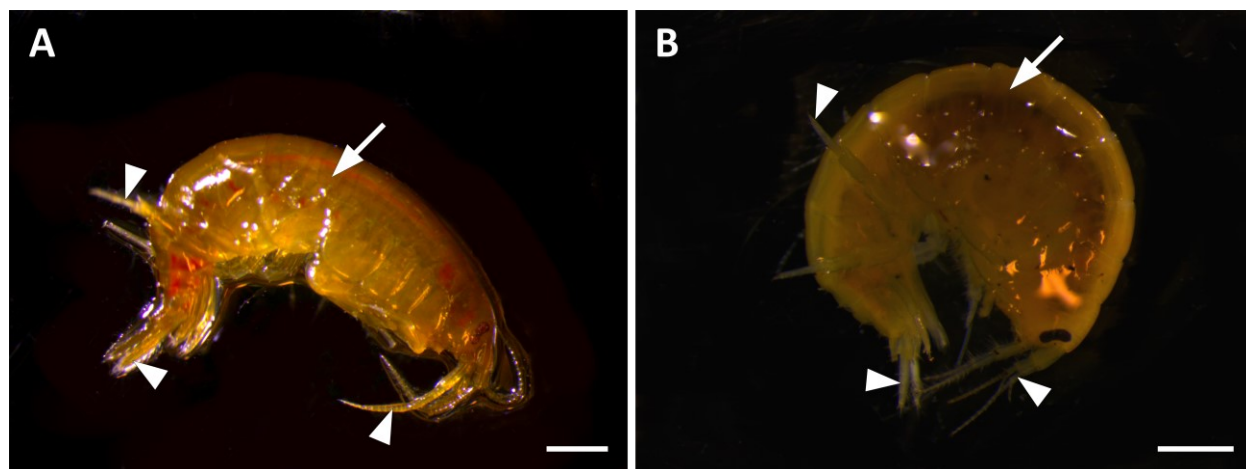

1  
2 **Fig. 2.** Stereo-microscopical images of live *Echinogammarus* sp. amphipods collected in Newton's Cove. **A.**  
3 Uninfected individual. Antennae, pereopods and uropods (arrowheads), internal organs (arrow) **B.** Individual  
4 heavily infected by *Txikispora philomaios*. The tegument of the infected individual appears more opaque, the gut  
5 (arrow) is not evident, especially in the posterior fraction of the body (pleon). Scale bars = 100  $\mu$ m for (A & B).

6  
7  
8  
9  
10  
11  
12  
13  
14  
15  
16  
17  
18  
19  
20  
21  
22

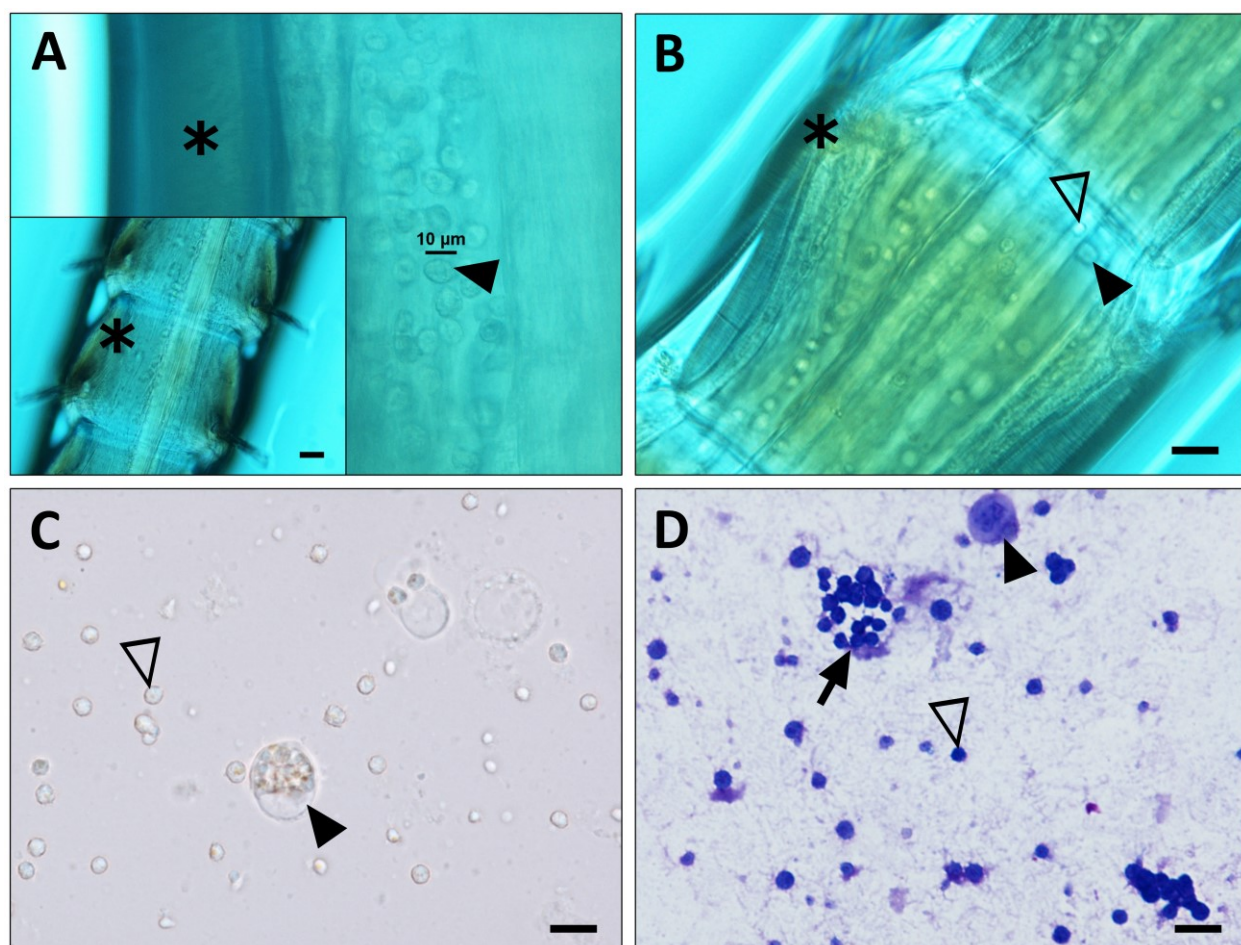

1  
2 **Fig. 3.** Light microscopic images of antennae (A, B), and haemolymph (C, D) from healthy (A) and infected (B, C,  
3 D) amphipods of genus *Echinogammarus*. **A.** Stereo microscope image of the antennae (inset) of a healthy  
4 amphipod individual, showing ( $\approx 10 \mu\text{m}$ ) haemocytes (arrowhead) flowing in the open circulatory system between  
5 the antennal gland and the tegument (asterisk). **B.** Cells of *Txikispora philomaios* (empty arrow) can be  
6 differentiated from haemocytes (filled arrowhead) by their smaller size and small nucleus. **C.** Composed microscope  
7 image of an unstained fresh preparation of the haemolymph showing *T. philomaios* cells free in the haemolymph  
8 (empty arrowhead) and within haemocytes (filled arrowhead). **D.** Toluidine blue-stained preparation of haemolymph  
9 from an infected amphipod showing *T. philomaios* single cells (empty arrowhead), parasitic cells inside haemocytes  
10 (filled arrowhead), and parasite cells forming multicellular groups (arrow). Scale bars =  $10 \mu\text{m}$  for (A, B, C, D), and  
11  $20 \mu\text{m}$  for inset in (A).

12  
13  
14  
15  
16

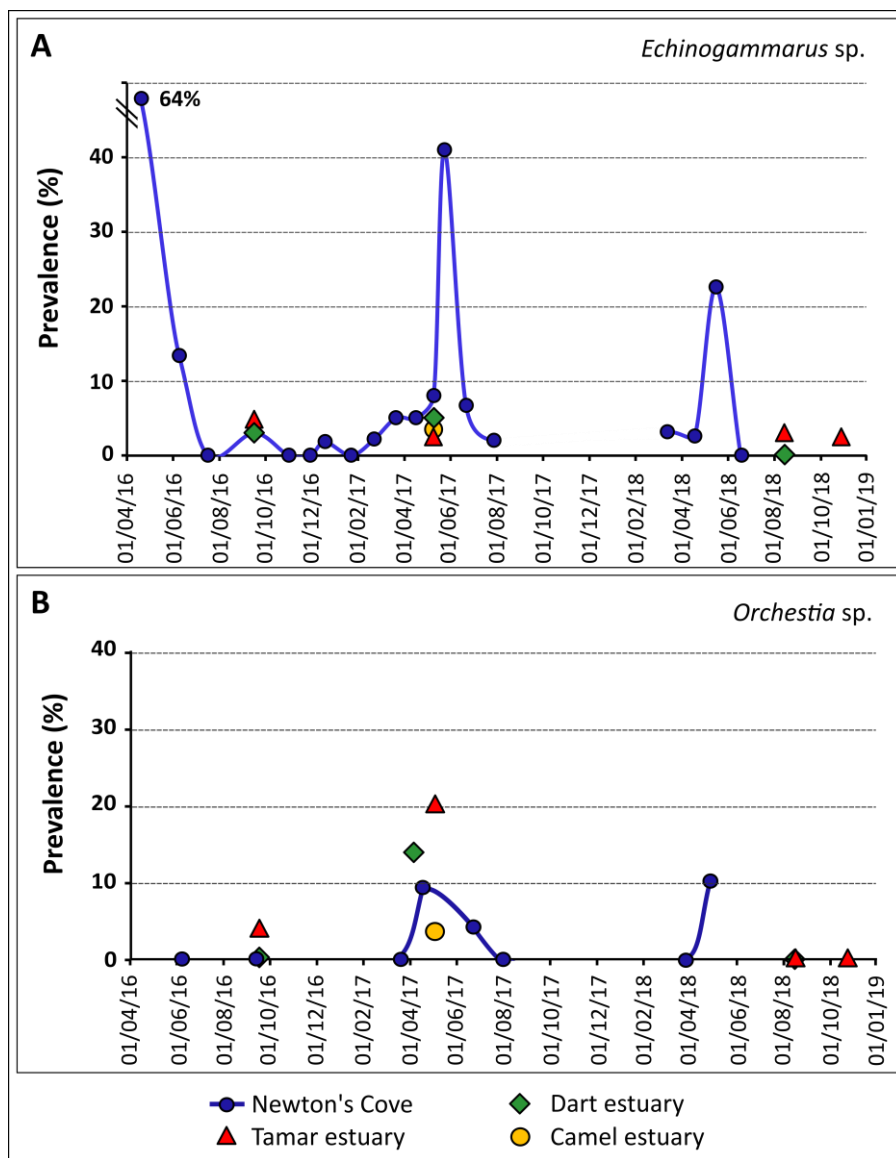

1  
 2 **Fig. 4.** Prevalence of *Txikispora philomaios* infection in *Echinogammarus* sp. (**A.**), and *Orchestia* sp. (**B.**) from  
 3 April 2016 to August 2018. Dates on the x-axis correspond to sampling information in (Table 1, 2). Y-axis: *T.*  
 4 *philomaios* infection prevalence (%). Blue spheres refer to amphipods collected in Newton's Cove; red triangles =  
 5 Tamar estuary; green diamonds = Dart estuary; yellow spheres = Camel estuary.

6  
 7  
 8  
 9  
 10  
 11



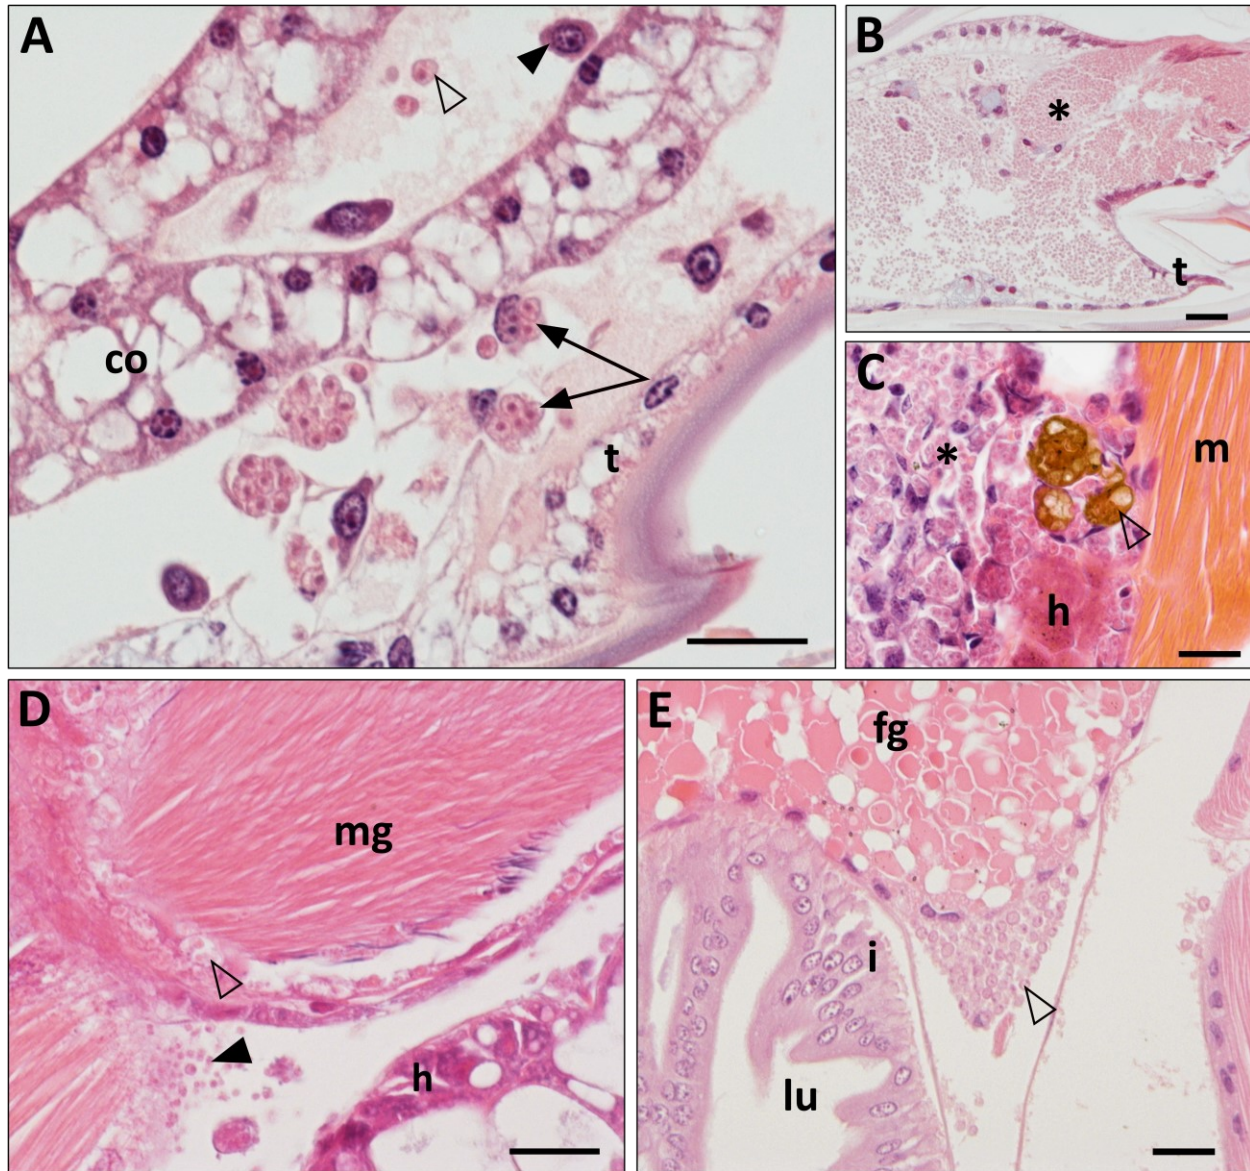

1  
2 **Fig. 5.** Histological appearance of *Txikispora philomaios* infecting different tissues in *Orchestia sp.* **A.** Parasite cells  
3 were observed free in the haemolymph (empty arrowhead) and inside haemocytes (arrows). Non-infected  
4 haemocytes (filled arrowhead), tegument (t) and connective tissue (co), in the pereopods of the amphipod. **B.**  
5 Masses of parasitic cells (\*) in the haemolymph and tegumental gland (t) associated to the cuticle of the carapace. **C.**  
6 Parasite cells (\*) infiltrating the hepatopancreas (h). Granulomas and melanization (empty arrowhead) and muscle  
7 fibres (m). **D.** *T. philomaios* cells infiltrated between muscle fibres (filled arrowhead) and inner connective layers  
8 (empty arrowhead) of male gonads (mg). **E.** Disrupted female gonadal tissue (fg) associated to parasitic cells (empty  
9 arrowhead). Unaffected intestine (i) and its lumen (lu). Scale bars = 20 µm for (A, B, C, D, E).

10

11

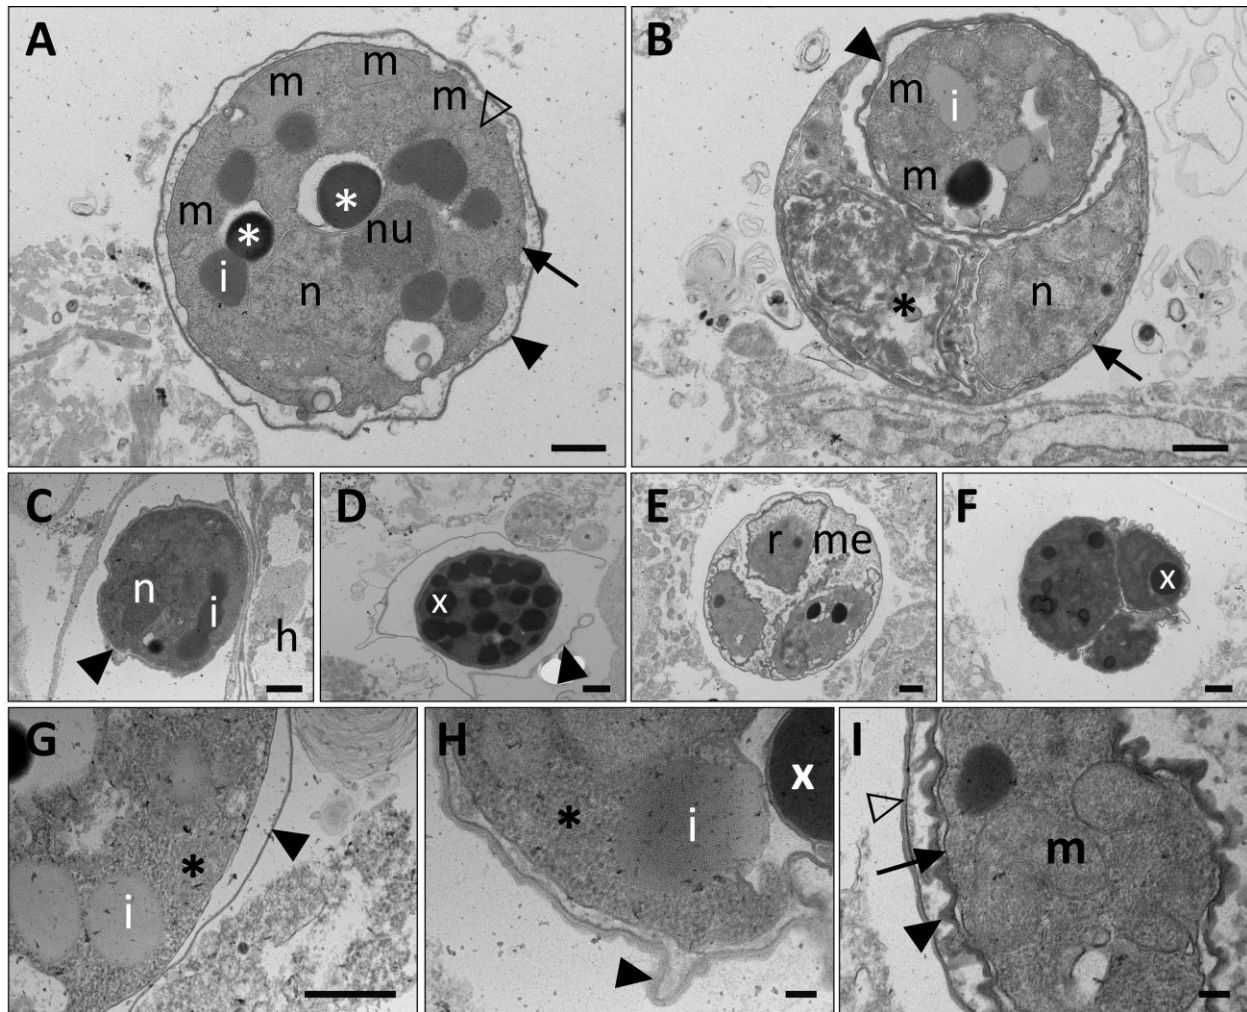

1  
2 **Fig. 6.** Transmission Electron Microscope (TEM) micrographs of *Txikispora philomaios* cells infecting *Orchestia*  
3 sp. **A.** Unicellular stages of the parasite show a single amorphous nucleus (n) with a peripheral nucleolus (nu),  
4 peripheric mitochondria (m) electron-dense lipidic vesicles (\*), and electron-lucent vesicles (i). The cell wall (filled  
5 arrowhead) appears detached from the plasma membrane (arrow). **B.** Dividing form of the parasite, with outer cell  
6 wall (arrow) and walled inner cells (filled arrowhead). One of the inner cells appears necrotic (\*). **C.** Unicellular  
7 stage attached to host cell (h); amorphous material between wall and plasma membrane (filled arrowhead); (i)  
8 electron-lucent vesicles (reserve material). **D.** Unicellular stage full of electron-dense vesicles (x) with disrupted cell  
9 wall around (filled arrowhead). **E.** Dividing form, with inner cells (r) partially sharing the same matrixial material  
10 (me) with the outer walled cell. **F.** Electron-dense tricellular stage still within an indistinct walled outer cell. **G.**  
11 Detail of the thin wall (filled arrowhead) of a unicellular parasite cell inside a host haemocyte. Electron-lucent  
12 vesicles (i) and granular cytoplasm (\*). **H.** Detail of a unicellular parasite cell with a thickening and evaginating  
13 cell wall (arrowhead). **I.** Detail of outer (empty arrowhead) and inner (filled arrowhead) cell walls, plasma membrane  
14 (arrow), and mitochondria (m). Scale bars = 500 nm for (A, B, C, D, E, F, G) and 100 nm for (H, I).

15

16

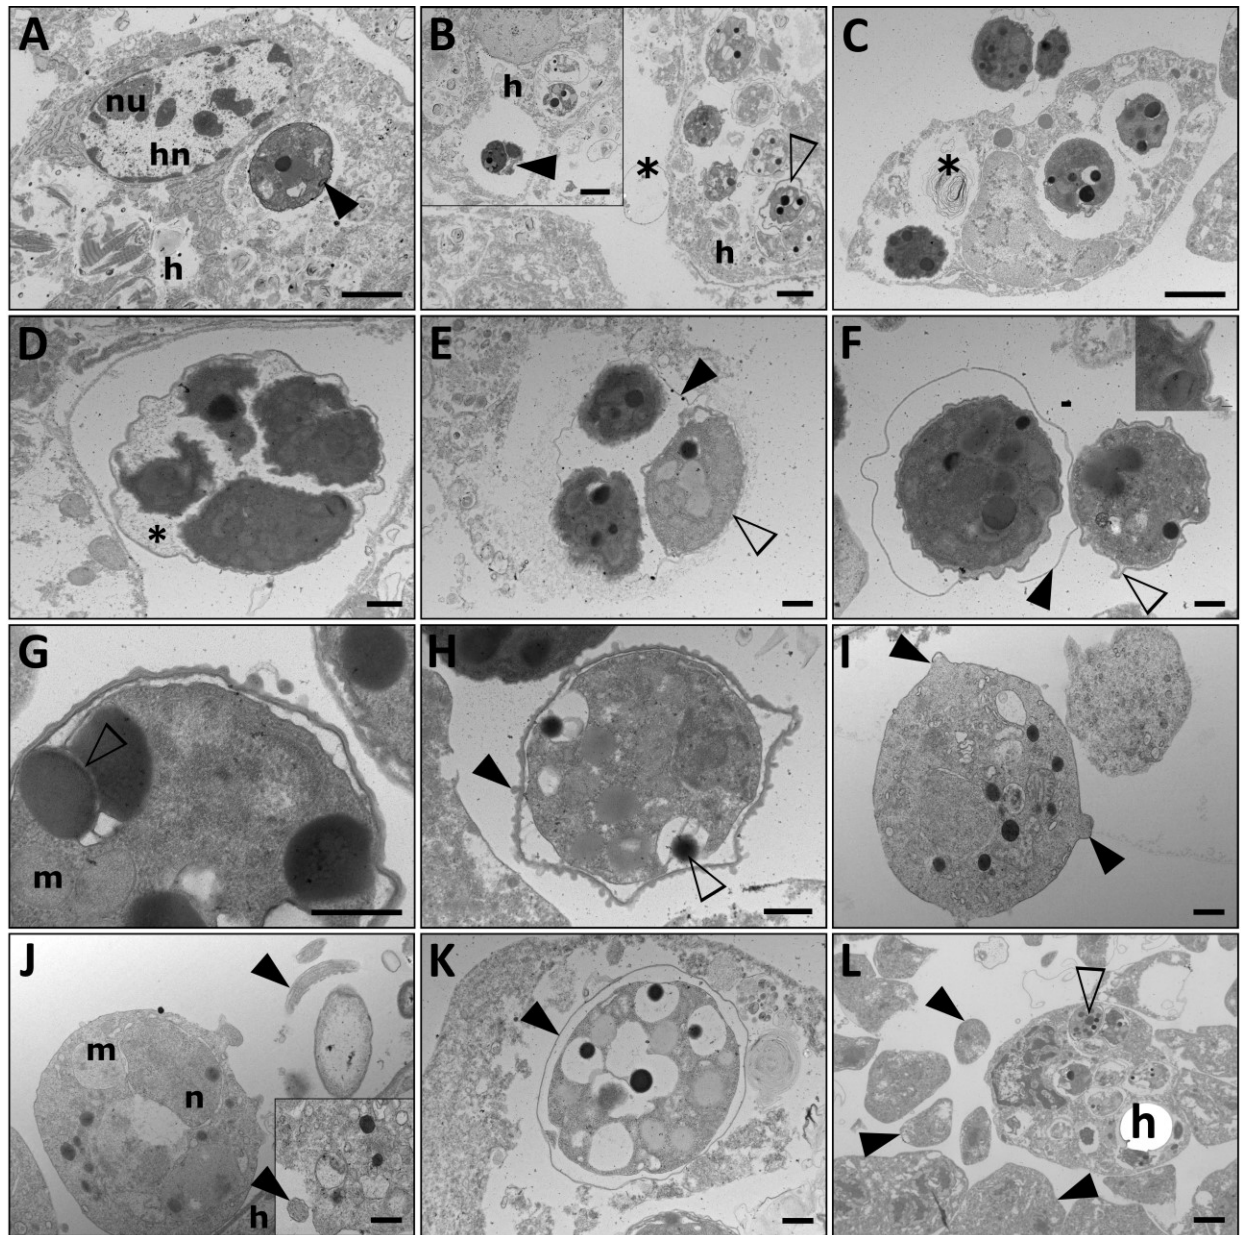

1  
2 **Fig. 7.** Transmission Electron Microscope (TEM) micrographs of *Txikispora philomaios* cells infecting *Orchestia*  
3 sp. **A.** Intracellular stage of *T. philomaios* with a fine and closely attached cell wall (filled arrowhead). The host (h),  
4 its nucleus (hn), and nucleolus (nu) are shown. **B.** Five unicellular and a single multicellular stage (empty  
5 arrowhead) inside a host haemocyte (h), with a presumed parasite cell wall (\*) attached to it. The inset shows the  
6 presence of a more electron-dense dividing form of *T. philomaios* (filled arrowhead) inside a host cell (h). **C.**  
7 Necrotic haemocyte containing three intact *T. philomaios* cells, with one vacuole containing a necrotic *T. philomaios*  
8 cell (\*). The infected host cell is unable to maintain its normal structure, also true for its nucleus (hn). **D.** Divisional  
9 stage of *T. philomaios*. Four electron-dense daughter cells increase in size inside the wall of the parent cell, which  
10 still contains an evident cytoplasmic matrix (\*). **E.** Three daughter cells inside a parent cell without matrix and a  
11 very reduced cell wall (arrowhead). One of the daughter cells is more translucent (empty arrowhead) than its sister  
12 cyst-like cells. **F.** Two unicellular stages, one of them with an open thin wall (filled arrowhead) similar to the one  
13 marked with an asterisk in figure 7B. The other with short projections of the outer cell wall (empty arrowhead).  
14 Detail of the inner structure of the projection in the inset. **G.** Detail of two electron-dense vesicles surrounded by a  
15 double lipidic membrane (empty arrowhead) in the immediate periphery of the cell. Mitochondria (m). **H.**  
16 Unicellular stage showing detachment of the outer cell-wall. The wall presents several subtle evaginations (filled

1 arrowhead). An electron-dense vesicle (empty arrowhead) is excreted to the space between plasma membrane and  
2 cell wall. **I.** Surface projections on a free *T. philomaios* cell (arrowheads). **J.** Parasite cell with mitochondria (m) and  
3 nucleus (n) in contact with a host cell (h). At least two flagellar structures (black arrows) have been observed  
4 flanking *T. philomaios* cells **K.** Intracellular stage of *T. philomaios* inside a host haemocyte with a thin detached  
5 wall (filled arrowhead) **L.** Coinfection of *T. philomaios* (empty arrowhead) and the ascetosporean parasite  
6 *Haplosporidium orchestiae* (filled arrowheads) in *Orchestia* sp. Only developing *T. philomaios* cells (empty  
7 arrowhead) are visible inside host haemocytes (h). Scale bars = 2  $\mu\text{m}$  for (A, B, C, L), and 500 nm for (D, E, F, G,  
8 H, I, J, K). Inset in (B) is 2  $\mu\text{m}$ ; inset in (F) is 100 nm.

9

10

11

12

13

14

15

16

17

18

19

20

21

22

23

24

25

26

27

28

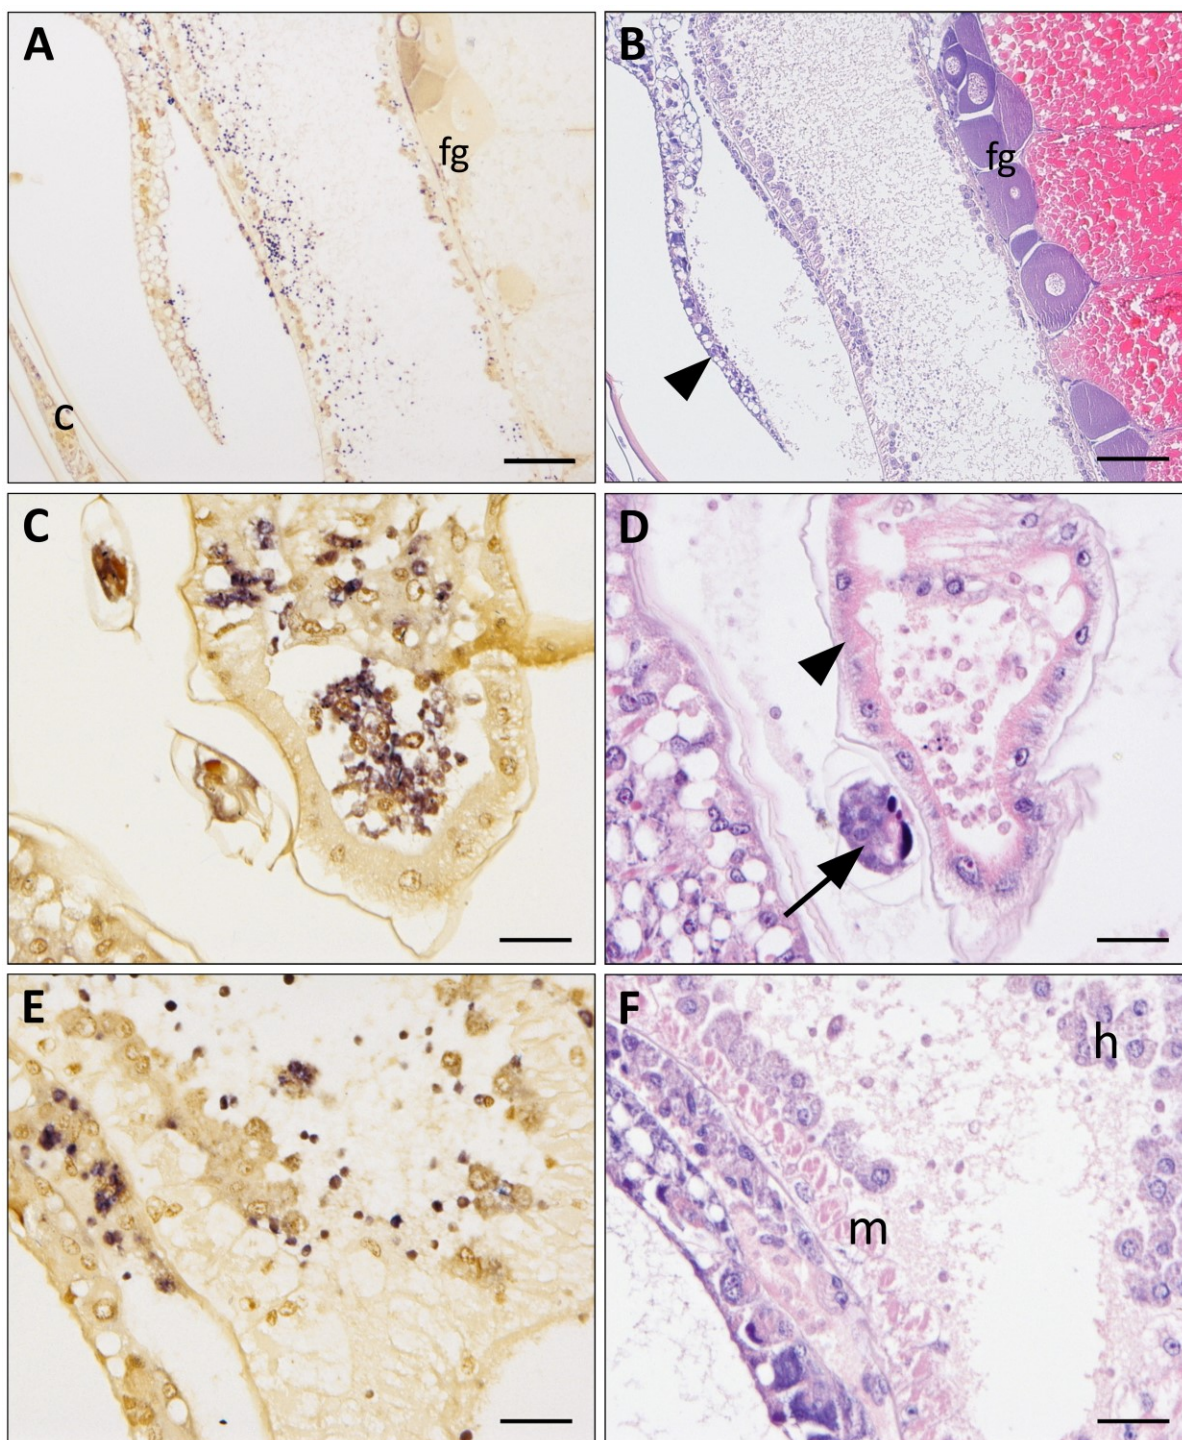

1  
2 **Fig. 8.** Histological sections of *Orchestia* sp. tissues following *In-Situ* Hybridization (ISH) using a DIG-labelled  
3 probe (A, C, E) and the respective consecutive histological H&E-stained section obtained from the same host (B, D,  
4 F). **A. & B.** *Txikispora philomaios* cells can be observed infecting the tegument (filled arrowhead) the cuticle (c) and  
5 haemocytes present in the cardiac tissues. Female gonads (fg) appear uninfected in this individual. **C. & D.** Infected  
6 gill cells (arrowhead) usually have ciliates attached (arrow), which are not infected in this occasion. Haemolymph  
7 circulating through the gills is heavily infected with *T. philomaios* cells. **E. & F.** Uninfected muscle (m) forming the  
8 cardiac tissue, pumps infected haemocytes (h) to other tissues. Scale bars = 100  $\mu\text{m}$  for (A, B) and 25  $\mu\text{m}$  for (C, D,  
9 E, F).

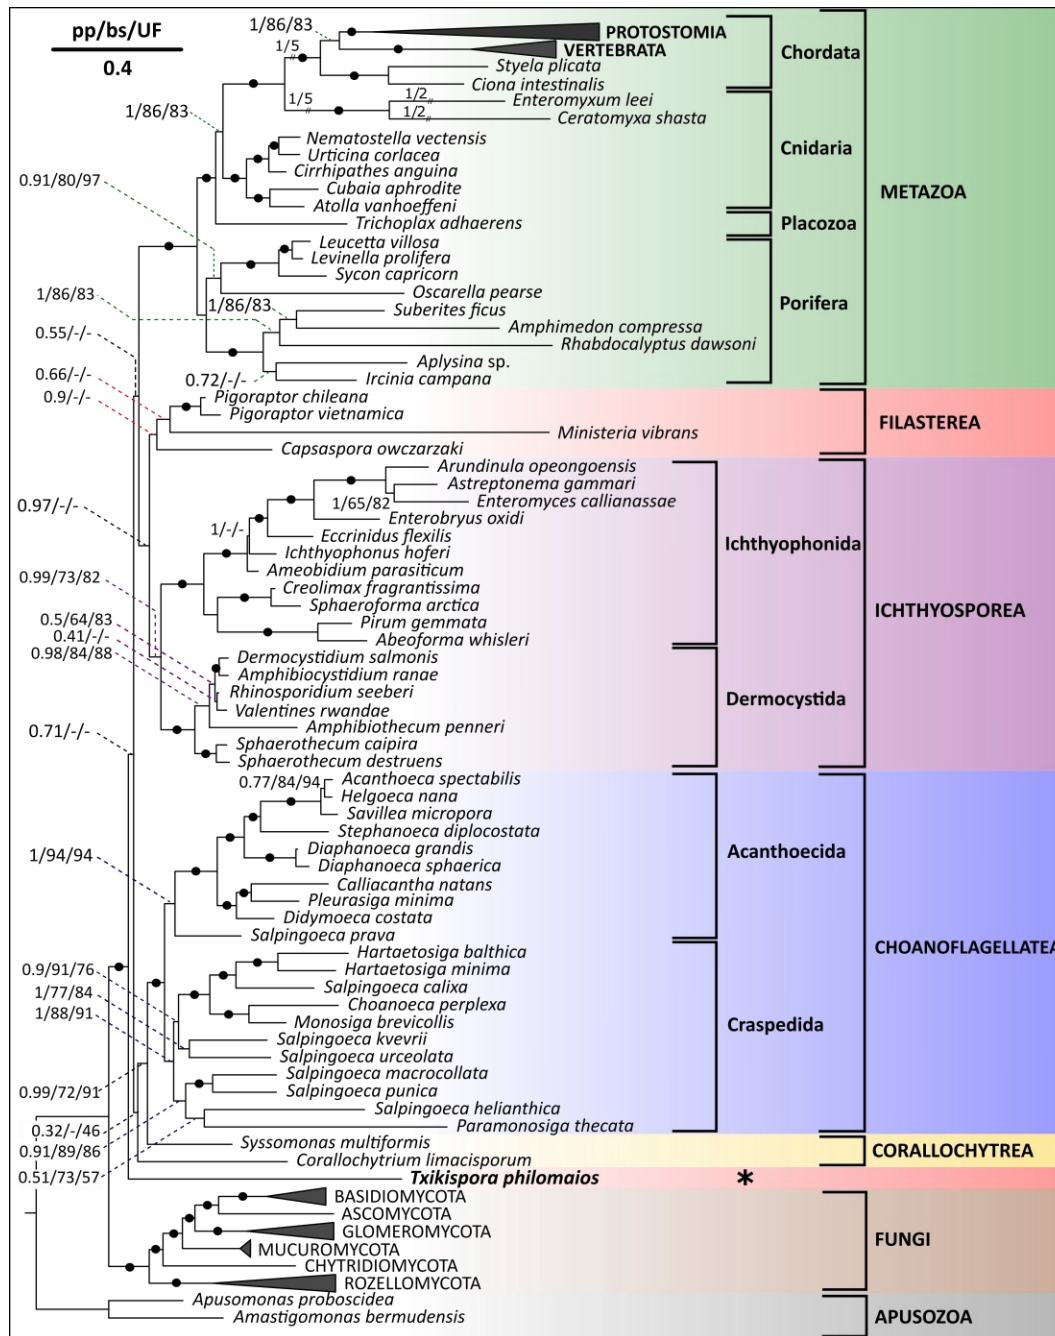

1  
2 **Fig. 9.** Bayesian phylogenetic analysis of 18S and 28S rRNA genes places the novel amphipod parasite *Txikispora*  
3 *philomaiois* (1679 bp) within Holozoa. The alignment included the 1679 bp 18S rRNA gene sequence of *T.*  
4 *philomaiois* and the 18S of the rest of species (28S sequences were included where available in Genbank). The tree  
5 includes a selection of the main opisthokont groups and unicellular holozoan lineages. Nodal support values are  
6 shown in clusters of three, representing Bayesian posterior probability (pp) run on MrBayes, maximum likelihood  
7 bootstrap support (bs) generated using RAxML with 1,000 replicates, and ML ultrafast 1,000 replicates bootstrap  
8 support (UF) from IQ-TREE, respectively. Nodes with values (> 0.95 pp, > 95% bs, > 95% UF) are represented by a  
9 black dot on the branch. Species belonging to clades Protostomia, Vertebrata, Basydiomycota, Glomeromycota,  
10 Mucurumycota, Chytridiomycota, and Rozellida were collapsed.

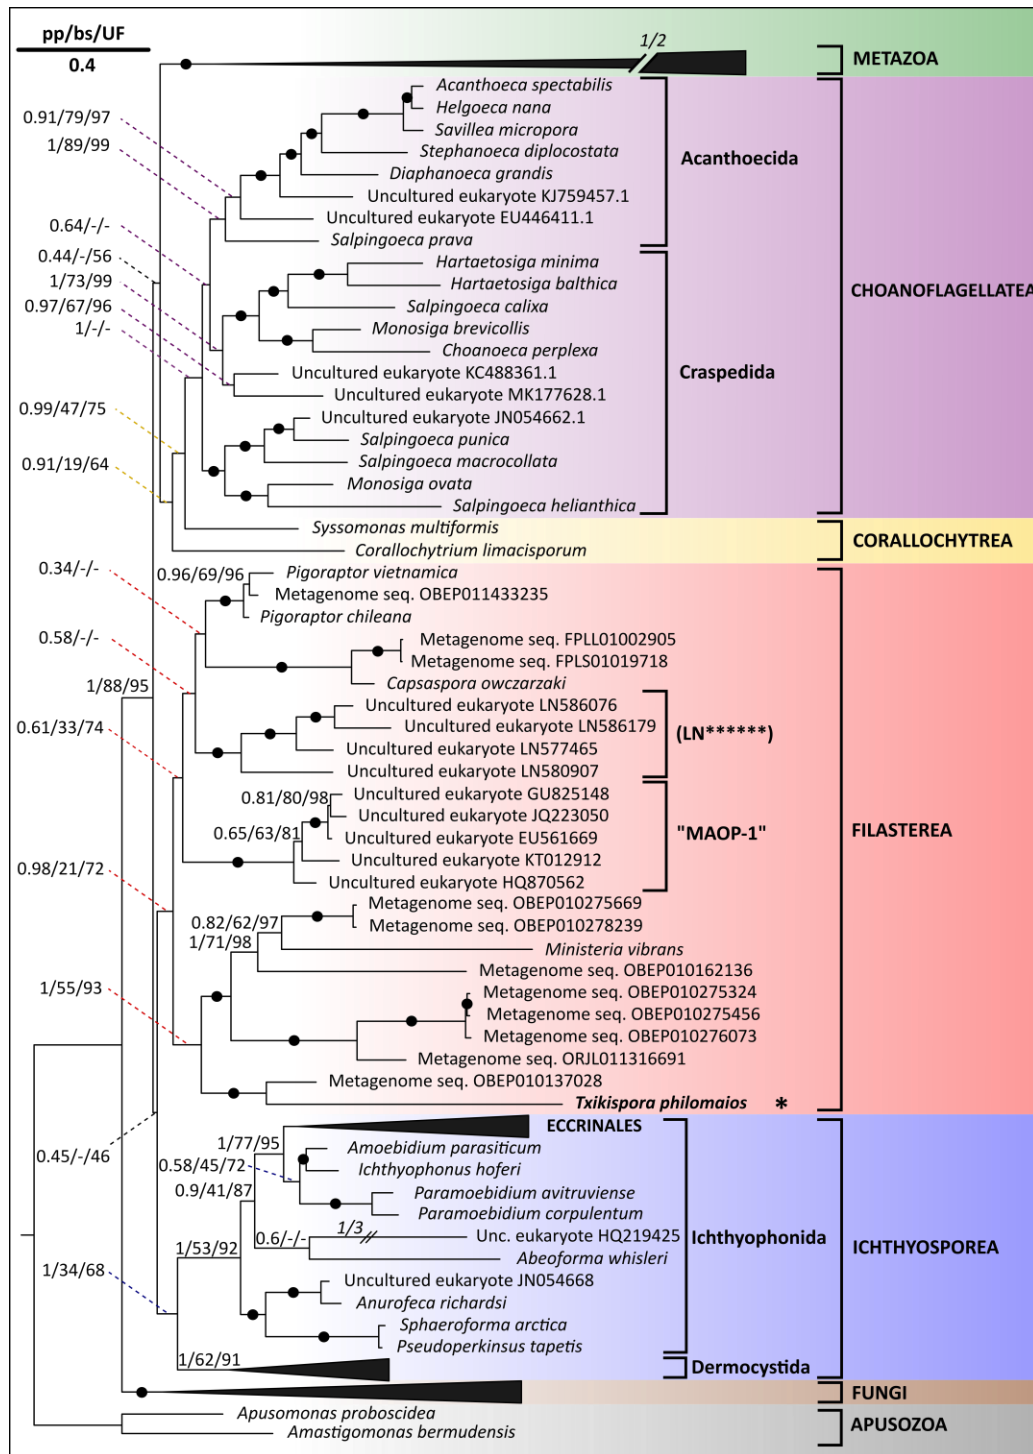

1  
 2 **Fig. 10.** Bayesian phylogenetic analysis of 18S and 28S rRNA genes, including environmental sequences, places the  
 3 novel amphipod parasite *Txikispora philomaioi* (1679 bp) within Filasterea. 28S sequences were included where  
 4 available in Genbank. Node support values are shown in clusters of three, representing Bayesian posterior  
 5 probability (pp) run on MrBayes, maximum likelihood bootstrap support (bs) generated using RAXML, and ML  
 6 ultrafast bootstrap support (UF) from IQ-TREE, respectively. Nodes with values (> 0.95 pp, > 95% bs, > 95% UF)  
 7 are represented by a black dot on the branch. Species belonging to Metazoa and Fungi were collapsed, as were  
 8 Eccrinales and Dermocystida (Ichthyosporea). Environmental sequences are indicated by their GenBank accession  
 9 numbers.

1 **TABLES**

2  
3 **Table 1:** Amphipods collected by this study for full histopathological screening. Number of individuals belonging to  
4 different genera are linked to the location and day of the sampling.  
5

| Sampling location                   | Location coordinates           | Date      | Number of amphipods sampled |                     |                   |                      |
|-------------------------------------|--------------------------------|-----------|-----------------------------|---------------------|-------------------|----------------------|
|                                     |                                |           | <i>Echinogammarus</i> sp.   | <i>Gammarus</i> sp. | <i>Melita</i> sp. | <i>Orchestia</i> sp. |
| <b>Dart Estuary</b>                 | 50° 23' 21" N<br>03° 35' 36" W | 19-Sep-16 | 64                          | 10                  | 10                | 31                   |
|                                     |                                | 26-Apr-17 | 40                          | 6                   | 23                | 21                   |
|                                     |                                | 13-Aug-18 | 41                          | 0                   | 0                 | 0                    |
| <b>Tamar estuary</b>                | 50° 23' 25" N<br>04° 13' 51" W | 20-Sep-16 | 84                          | 0                   | 4                 | 28                   |
|                                     |                                | 27-Apr-17 | 41                          | 27                  | 18                | 37                   |
|                                     |                                | 14-Aug-18 | 48                          | 0                   | 0                 | 34                   |
|                                     |                                | 08-Nov-18 | 35                          | 7                   | 0                 | 27                   |
| <b>Camel Estuary</b>                | 50° 32' 17" N<br>04° 56' 05" W | 28-Apr-17 | 30                          | 29                  | 6                 | 37                   |
| <b>Newton's Cove<br/>(Weymouth)</b> | 50° 36' 17" N<br>02° 27' 03" W | 20-Apr-16 | 50                          | 0                   | 0                 | 0                    |
|                                     |                                | 08-Jun-16 | 30                          | 0                   | 0                 | 0                    |
|                                     |                                | 13-Sep-16 | 38                          | 30                  | 13                | 32                   |
|                                     |                                | 28-Oct-16 | 30                          | 20                  | 0                 | 0                    |
|                                     |                                | 25-Nov-16 | 40                          | 0                   | 0                 | 0                    |
|                                     |                                | 14-Dic-16 | 63                          | 42                  | 9                 | 0                    |
|                                     |                                | 17-Jan-17 | 40                          | 30                  | 6                 | 0                    |
|                                     |                                | 16-Feb-17 | 50                          | 23                  | 4                 | 0                    |
|                                     |                                | 16-Mar-17 | 54                          | 0                   | 0                 | 6                    |
|                                     |                                | 11-Apr-17 | 38                          | 15                  | 5                 | 0                    |
|                                     |                                | 04-May-17 | 51                          | 0                   | 0                 | 0                    |
|                                     |                                | 18-May-17 | 31                          | 0                   | 0                 | 0                    |
|                                     |                                | 15-Jun-17 | 12                          | 10                  | 0                 | 25                   |
|                                     |                                | 21-Jul-17 | 40                          | 10                  | 0                 | 23                   |
|                                     |                                | 16-Mar-18 | 55                          | 12                  | 0                 | 10                   |
| 16-Apr-18                           | 45                             | 8         | 0                           | 4                   |                   |                      |
| 11-May-18                           | 31                             | 0         | 0                           | 0                   |                   |                      |
| 13-Jun-18                           | 55                             | 0         | 0                           | 0                   |                   |                      |

6  
7  
8  
9  
10  
11  
12  
13  
14  
15  
16  
17  
18



1 **Table 2:** Sampling information for invertebrate species collected for PCR screening of *Txikispora philomaios* in  
 2 Newton's Cove. The sampling date, the organism's genus/clade, and the number of individual organisms included in  
 3 each batch. Between brackets in "Organism", stereomicroscopical images of the taxa (A, B, C, D). Between brackets  
 4 in "No. of Individuals" the total number of individuals per PCR tube.

| Sampling location                                                                                       | Date      | Organism                      | Number of individuals                  |                                                                                     |
|---------------------------------------------------------------------------------------------------------|-----------|-------------------------------|----------------------------------------|-------------------------------------------------------------------------------------|
| Newton's Cove,<br>Weymouth, UK.<br>(Upper intertidal)<br>Coordinates:<br>50° 36' 17" N<br>02° 27' 03" W | 21-may-19 | <i>Capitella</i> sp. (A)      | 45 (3 tubes, 15 ind. each)             | 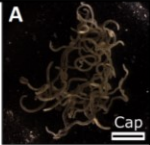 |
|                                                                                                         |           | <i>Procerodes</i> sp. (B)     | 60 (2 tubes, 30 ind. each)             |                                                                                     |
|                                                                                                         |           | <i>Echinogammarus</i> sp. (D) | 100 (4 tubes, 2 x 20 big 2 x 30 small) |                                                                                     |
|                                                                                                         |           | Copepoda (C)                  | 300 (2 tubes, 150 ind. each)           |                                                                                     |
|                                                                                                         | 10-jul-19 | <i>Capitella</i> sp.          | 90 (3 tubes, 30 ind. each)             |  |
|                                                                                                         |           | <i>Procerodes</i> sp.         | 90 (3 tubes, 30 ind. each)             |                                                                                     |
|                                                                                                         |           | <i>Echinogammarus</i> sp.     | 100 (4 tubes, 2 x 20 big 2 x 30 small) |                                                                                     |
|                                                                                                         |           | Copepoda                      | 400 (2 tubes, 200 ind. each)           |                                                                                     |
|                                                                                                         | 05-ago-19 | <i>Capitella</i> sp.          | 120 (4 tubes, 30 ind. each)            |  |
|                                                                                                         |           | <i>Procerodes</i> sp.         | 120 (4 tubes, 30 ind. each)            |                                                                                     |
|                                                                                                         |           | <i>Echinogammarus</i> sp.     | 100 (4 tubes, 2 x 20 big 2 x 30 small) |                                                                                     |
|                                                                                                         |           | Copepoda                      | 100 (1 tube)                           |                                                                                     |
|                                                                                                         | 28-sep-19 | <i>Capitella</i> sp.          | 120 (4 tubes, 30 ind. each)            |  |
|                                                                                                         |           | <i>Procerodes</i> sp.         | 120 (4 tubes, 30 ind. each)            |                                                                                     |
|                                                                                                         |           | <i>Echinogammarus</i> sp.     | 100 (4 tubes, 2 x 20 big 2 x 30 small) |                                                                                     |
|                                                                                                         |           | Copepoda                      | 500 (2 tubes, 250 ind. each)           |                                                                                     |

5  
6  
7  
8  
9  
10  
11  
12  
13  
14  
15  
16  
17  
18  
19  
20  
21  
22

1 **Table 3.** List of primers designed for *Txikispora philomaios* amplification and universal primer SA1nF (\*) from  
 2 Bass et al. 2012. The melting temperature (T<sub>m</sub>) and the sequence for each primer is specified. In the bottom, a  
 3 diagram indicating position of attachment for each primer in the 18S ssu rRNA and direction of amplification.

| Primers for <i>Txikispora philomaios</i> 18S ssu rRNA |                |                          |
|-------------------------------------------------------|----------------|--------------------------|
| Primer                                                | T <sub>m</sub> | Sequence (5' - 3')       |
| SA1nF *                                               | 65.9°C         | ACCTGGTTGATCCTGCCAGT     |
| S47-152F                                              | 68.0°C         | AGCTAATACATGCTGCAAAGCGG  |
| S47-472F                                              | 73.2°C         | TACCGGGCCTTCAAGGCACG     |
| S47-617R                                              | 74.5°C         | CGCTTTCACGCGACCATCACAAAC |
| S47-1027R                                             | 71.6°C         | ATACGGTGCCGAGAGCGTCAAA   |
| S47-631R                                              | 62.7°C         | CTCCAAGACCTCACTAAATCAC   |

  

4  
5  
6  
7  
8  
9  
10  
11  
12  
13  
14  
15  
16  
17  
18  
19  
20  
21  
22

1 **Table 4:** List of existing filastereans and uncultured organisms associated to this lineage according to our  
 2 phylogenetic analysis (Figs. 10, 11). The sequence ID corresponds the name used in the phylogenetic trees, and it is  
 3 linked to the ecosystem (sampling niche) and the geographic site (sampling location) from which the 18S ssu rRNA  
 4 was collected. In the case of parasites and symbionts, susceptible hosts have been specified as the sampling niche.  
 5 The list also includes the sequences' length, its identity (percentage) to *T. philomaiaos*' 18s, the database from which  
 6 it was mined, and the reference to the authors who uploaded/published it.

| TAXON                 | Species / Sequence ID | Sampling niche             | Sampling location          | Length  | Identity with <i>T. philomaiaos</i> | Database        | Reference                  |
|-----------------------|-----------------------|----------------------------|----------------------------|---------|-------------------------------------|-----------------|----------------------------|
| <i>C. owczarzaki</i>  | AF349564.1            | Symbiont (Mollusc)         | Puerto Rico. (ATCC)        | 1797 bp | 85.58%                              | GenBank (nr/nt) | Amaral-Zettler et al. 2001 |
| <i>C. owczarzaki</i>  | AF436888.1            | Symbiont (Mollusc)         | Brazil (ATCC)              | 1714 bp | 85.47%                              | GenBank (nr/nt) | Amaral-Zettler et al. 2001 |
| <i>M. vibrans</i>     | AF271997.1            | Coastal marine water       | Cape Town, South Africa    | 1793 bp | 83.59%                              | GenBank (nr/nt) | Cavalier-smith & Chao 2003 |
| <i>M. vibrans</i>     | AF271998.1            | Coastal marine water       | Southampton, UK            | 1795 bp | 83.83%                              | GenBank (nr/nt) | Cavalier-smith & Chao 2003 |
| <i>P. chileana</i>    | MF190553.1            | Sediments, Lake            | Lago Blanca, Chile         | 1792 bp | 87.48%                              | GenBank (nr/nt) | Hehenberger et al. 2017    |
| <i>P. vietnamica</i>  | MF190552.1            | Sediments, Lake            | Dak Lak, Vietnam           | 1794 bp | 86.55%                              | GenBank (nr/nt) | Hehenberger et al. 2017    |
| <i>T. philomaiaos</i> |                       | Parasite (Crustacea)       | Weymouth, UK               | 1679 bp | 100.00%                             | GenBank (nr/nt) | This study                 |
| Unc. Filasterea       | EU561669              | Coastal marine water       | Oyster Bay, South Africa   | 893 bp  | 87.10%                              | GenBank(wgs)    | Not et al. 2008            |
| Unc. Filasterea       | FPLL01002905          | Grassland                  | Aalborg, Denmark           | 1331 bp | 85.95%                              | EBI/ENA (wgs)   | Karst et al. 2016          |
| Unc. Filasterea       | FPLS01019718          | Grassland                  | Aalborg, Denmark           | 1337 bp | 86.02%                              | EBI/ENA (wgs)   | Karst et al. 2016          |
| Unc. Filasterea       | GU825148.1            | Marine (anoxic) water      | Cariaco Basin, Venezuela   | 1067 bp | 86.65%                              | GenBank (nr/nt) | Edgcomb et al. 2011        |
| Unc. Filasterea       | HQ870562.1            | Marine (anoxic) water      | Vancouver, Canada          | 840 bp  | 87.10%                              | GenBank (nr/nt) | Orsi et al. 2011           |
| Unc. Filasterea       | JQ223050.1            | Marine (anoxic) water      | Vancouver, Canada          | 1626 bp | 86.50%                              | GenBank (nr/nt) | Unpublished                |
| Unc. Filasterea       | KT012912.1            | Marine water               | North Pacific (near Japan) | 918 bp  | 90.17%                              | GenBank (nr/nt) | Unpublished                |
| Unc. Filasterea       | LN577465.1            | Ant nest near river        | Gamboa, Panama             | 730 bp  | 93.23%                              | EBI/ENA (nt)    | Scott et al. 2014          |
| Unc. Filasterea       | LN580907.1            | Ant nest near river        | Gamboa, Panama             | 723 bp  | 91.90%                              | EBI/ENA (nt)    | Scott et al. 2014          |
| Unc. Filasterea       | LN586076.1            | Ant nest near river        | Gamboa, Panama             | 725 bp  | 91.20%                              | EBI/ENA (nt)    | Scott et al. 2014          |
| Unc. Filasterea       | LN586179.1            | Ant nest near river        | Gamboa, Panama             | 726 bp  | 91.25%                              | EBI/ENA (nt)    | Scott et al. 2014          |
| Unc. Filasterea       | OBEP010137028         | Algae and sediments, beach | Limfjorden, Denmark        | 1448 bp | 90.44%                              | EBI/ENA (wgs)   | Karst et al. 2018          |
| Unc. Filasterea       | OBEP010162136         | Algae and sediments, beach | Limfjorden, Denmark        | 1482 bp | 84.93%                              | EBI/ENA (wgs)   | Karst et al. 2018          |
| Unc. Filasterea       | OBEP010275324         | Ground water               | Aalborg, Denmark           | 1530 bp | 84.07%                              | EBI/ENA (wgs)   | Karst et al. 2018          |
| Unc. Filasterea       | OBEP010275456         | Ground water               | Aalborg, Denmark           | 1403 bp | 83.80%                              | EBI/ENA (wgs)   | Karst et al. 2018          |
| Unc. Filasterea       | OBEP010275669         | Ground water               | Aalborg, Denmark           | 1235 bp | 87.84%                              | EBI/ENA (wgs)   | Karst et al. 2018          |
| Unc. Filasterea       | OBEP010276073         | Ground water               | Aalborg, Denmark           | 1269 bp | 85.07%                              | EBI/ENA (wgs)   | Karst et al. 2018          |
| Unc. Filasterea       | OBEP010278239         | Ground water               | Aalborg, Denmark           | 1378 bp | 87.74%                              | EBI/ENA (wgs)   | Karst et al. 2018          |
| Unc. Filasterea       | OBEP011433235         | Sediments, lake            | Madum, Denmark             | 1179 bp | 88.49%                              | EBI/ENA (wgs)   | Karst et al. 2018          |
| Unc. Filasterea       | ORJL011316691         | Ground water               | South Glen Falls, NY, USA  | 1107 bp | 88.34%                              | EBI/ENA (wgs)   | Wilhelm et al. 2018        |

7
